# Supplementary material for: Study protocol for a randomised controlled trial on the use of intraoperative ultrasound-guided laparoscopic ovarian cystectomy (UGLOC) as a method of fertility preservation in the management of benign ovarian cysts
Source: PubMed Central journal article supplement — BMJ Open. 2022 Jul 13;12(7):e060409. doi: 10.1136/bmjopen-2021-060409 (PMC9289018; doi:10.1136/bmjopen-2021-060409), 2022-07-13
Supplement: bmjopen-2021-060409.draft_revisions.pdf [file bmjopen-2021-060409.draft_revisions.pdf]

# BMJ Open

BMJ Open is committed to open peer review. As part of this commitment we make the peer review history of every article we publish publicly available.

When an article is published we post the peer reviewers' comments and the authors' responses online. We also post the versions of the paper that were used during peer review. These are the versions that the peer review comments apply to.

The versions of the paper that follow are the versions that were submitted during the peer review process. They are not the versions of record or the final published versions. They should not be cited or distributed as the published version of this manuscript.

BMJ Open is an open access journal and the full, final, typeset and author-corrected version of record of the manuscript is available on our site with no access controls, subscription charges or pay-per-view fees (<http://bmjopen.bmj.com>).

If you have any questions on BMJ Open's open peer review process please email [info.bmjopen@bmj.com](mailto:info.bmjopen@bmj.com)

# BMJ Open

## Intra-operative Ultrasound Guided Laparoscopic Ovarian Cystectomy (UGLOC) as a method of fertility preservation in the management of benign ovarian cysts: a randomised controlled trial

|                               |                                                                                                                                                                                                                                                                                                                                                                                                                                                                                                                                                                                                                                                                |
|-------------------------------|----------------------------------------------------------------------------------------------------------------------------------------------------------------------------------------------------------------------------------------------------------------------------------------------------------------------------------------------------------------------------------------------------------------------------------------------------------------------------------------------------------------------------------------------------------------------------------------------------------------------------------------------------------------|
| Journal:                      | <i>BMJ Open</i>                                                                                                                                                                                                                                                                                                                                                                                                                                                                                                                                                                                                                                                |
| Manuscript ID                 | bmjopen-2021-060409                                                                                                                                                                                                                                                                                                                                                                                                                                                                                                                                                                                                                                            |
| Article Type:                 | Protocol                                                                                                                                                                                                                                                                                                                                                                                                                                                                                                                                                                                                                                                       |
| Date Submitted by the Author: | 20-Dec-2021                                                                                                                                                                                                                                                                                                                                                                                                                                                                                                                                                                                                                                                    |
| Complete List of Authors:     | Kasaven, Lorraine S; Imperial College London, Cancer and Surgery; Queen Charlotte's and Chelsea Hospital, Obstetrics and Gynaecology<br>Jones, Benjamin; Imperial College London<br>Ghaem-Maghami, Sadaf; Imperial College London; Imperial College Healthcare NHS Trust<br>Verbakel, Jan; University of Oxford, Nuffield Department of Primary Care Health Sciences; KU Leuven, Department of Public Health and Primary Care<br>El-Bahrawy, Mona; Imperial College Healthcare NHS Trust, Department of Metabolism, Digestion and Reproduction<br>Saso, Srdjan; Imperial College Healthcare NHS Trust<br>Yazbek, Joseph; Imperial College Healthcare NHS Trust |
| Keywords:                     | Ultrasonography < OBSTETRICS, Minimally invasive surgery < GYNAECOLOGY, Reproductive medicine < GYNAECOLOGY                                                                                                                                                                                                                                                                                                                                                                                                                                                                                                                                                    |
|                               |                                                                                                                                                                                                                                                                                                                                                                                                                                                                                                                                                                                                                                                                |

SCHOLARONE™  
Manuscripts

**BMJ Open****Intra-operative Ultrasound Guided Laparoscopic Ovarian Cystectomy (UGLOC) as a method of fertility preservation in the management of benign ovarian cysts: a randomised controlled trial**

Lorraine S Kasaven,<sup>1,2,3</sup> Benjamin P Jones,<sup>1,2</sup> Sadaf Ghaem-Maghani,<sup>1</sup> Professor Jan Verbakel,<sup>4</sup> Mona El-Bahrawy,<sup>5</sup> Srdjan Saso,<sup>1</sup> Joseph Yazbek<sup>1</sup>

<sup>1</sup> West London Gynaecological Cancer Centre, Hammersmith Hospital, Imperial College NHS Trust, London, W12 0HS, UK.

<sup>2</sup> Department of Surgery and Cancer, Imperial College London, Du Cane Road, London W12 0NN, UK.

<sup>3</sup> Department of Cutrale Perioperative and Ageing Group, Imperial College London, W12 0NN, UK.

<sup>4</sup> Department of Public Health and Primary Care, Academisch Centrum voor Huisartsgeneeskunde

<sup>5</sup> Department of Metabolism, Digestion and Reproduction, Imperial College London, Hammersmith Hospital, London, W12 0NN, UK.

**Corresponding Author:**

Miss Lorraine Kasaven, BSc, MBChB, MRCOG, PGCert  
Department of Surgery and Cancer, Imperial College London,  
Du Cane Road, London W12 0NN, United Kingdom.

E-mail: lk226@doctors.org.uk

**Word count: 3,597**

1  
2  
3 **29 Abstract**  
4

5 **30 Introduction:** The lifetime risk of women undergoing surgery for the presence of benign ovarian  
6  
7 **31** pathology in the united kingdom (UK) is 5-10%.<sup>(1)</sup> Despite minimally invasive surgical techniques,  
8  
9 **32** evidence suggests a number of healthy ovarian follicles and tissues are resected intraoperatively,  
10  
11 **33** resulting in subsequent decline of ovarian reserve. Increasing demand for the implementation of  
12  
13 **34** fertility sparing surgical techniques is therefore prevalent. This study will evaluate the effect on  
14  
15 **35** ovarian reserve following two different surgical interventions for the management of benign ovarian  
16  
17 **36** cysts.

18  
19  
20 **37 Methods and analysis:** We will conduct a two-armed randomised controlled trial comparing  
21  
22 **38** laparoscopic ovarian cystectomy, considered gold standard treatment as per the Royal College of  
23  
24 **39** Obstetricians and Gynaecologists (RCOG) Green Top guidelines for the management of benign  
25  
26 **40** ovarian cysts<sup>(1)</sup>, with ultrasound guided laparoscopic ovarian cystectomy (UGLOC), a novel method  
27  
28 **41** of fertility sparing surgery (FSS). The primary outcome will be the difference in anti-Mullerian  
29  
30 **42** hormone (pmol/L) (AMH) and antral follicle count (AFC) measured 3 and 6 months post operatively  
31  
32 **43** from the pre-operative baseline. Secondary outcomes include assessment of various surgical and  
33  
34 **44** histopathological outcomes including: duration of hospital stay (days), duration of surgery (mins),  
35  
36 **45** presence of intra-operative cyst rupture (yes/no), presence of ovarian tissue within the specimen  
37  
38 **46** (yes/no) and the grade of follicles excised with specimen (grade 0-4). We aim to randomise 32  
39  
40 **47** patients over 3 years to achieve 95% power for detecting a 25% difference in the primary outcome at  
41  
42 **48** a significance of 5%.

43  
44  
45 **49 Ethics and dissemination:** Findings will be published in peer reviewed journals and presented at  
46  
47 **50** national and international conferences and scientific meetings. The Chelsea NHS Research and Ethics  
48  
49 **51** Committee have awarded ethical approval of the study (21/LO/036).

50  
51 **52 Trial registration number:** NCT05032846  
52  
53  
54  
55  
56  
57  
58  
59  
60

1  
2  
3  
4  
5  
6  
7  
8  
9  
10  
11  
12  
13  
14  
15  
16  
17  
18  
19  
20  
21  
22  
23  
24  
25  
26  
27  
28  
29  
30  
31  
32  
33  
34  
35  
36  
37  
38  
39  
40  
41  
42  
43  
44  
45  
46  
47  
48  
49  
50  
51  
52  
53  
54  
55  
56  
57  
58  
59  
60

57 **Key words**

58

59 Intra-operative ultrasound, benign ovarian cyst, fertility preservation surgery

60

61

62

63

64

65

66

67

68

69

70

71

72

73

74

75

76

77

78

79

80

81

82

83

84

For peer review only

1  
2  
3 85 **Strengths and limitations of this study**  
4

- 5 86 • This is the only reported prospective, randomised controlled trial to assess the use of intra-  
6  
7 87 operative ultrasound as a method of fertility preservation surgery  
8  
9 88 • The trial will provide an evaluation of two different surgical interventions for the  
10  
11 89 management of benign ovarian cysts, in order to optimise women's ovarian reserve  
12  
13  
14 90 • The intervention is non- blinded  
15  
16 91 • Follow up of patients is limited to 6 months  
17  
18  
19  
20  
21  
22  
23  
24  
25  
26  
27  
28  
29  
30  
31  
32  
33  
34  
35  
36  
37  
38  
39  
40  
41  
42  
43  
44  
45  
46  
47  
48  
49  
50  
51  
52  
53  
54  
55  
56  
57  
58  
59  
60

## 112 **Background**

113

114 Within the field of reproductive medicine, advancements over the last few decades have facilitated the  
115 rapidly emerging sub-specialty in gynaecology, known as fertility preservation. This includes various  
116 methods to preserve reproductive tissue or gametes such as medical, surgical or laboratory techniques,  
117 thus empowering women to preserve their fecundity with a view to achieving pregnancy at a later  
118 date.<sup>(2)</sup> Such techniques were initially considered for women of reproductive age diagnosed with  
119 cancer, embarking on gonadotoxic treatment regimens including chemotherapy or radiotherapy, or  
120 undergoing radical surgery to remove gynaecological organs, thus rendering them infertile. Thus, in  
121 the context of surgical management of gynaecological cancers, there has been an increasing demand  
122 for less radical procedures, with a shift towards conservative surgical methods, in order to preserve  
123 the reproductive organs. In appropriately selected women, this enables the opportunity to balance the  
124 risks of recurrence from disease, whilst reserving the ability to conceive in the future. As such, the  
125 mainstay treatment of Borderline Ovarian Tumours for example, in women with early-stage disease,  
126 non-invasive implants or for those who wish to conceive, is fertility sparing surgery (FSS). Such  
127 procedures include performing a unilateral salpingo-oophorectomy (USO) or ovarian cystectomy,  
128 compared to previously adopted surgical methods of radical debulking, which required bilateral  
129 salpingo-oophorectomy. Evidence suggests that FSS in this context is both safe and feasible.<sup>(3)</sup>

130

131 Infertility however is no longer limited to women undergoing treatment for cancer, as evidence  
132 suggests 1 in 6 women experience infertility.<sup>(4)</sup> Although there are a number of causes, it is also  
133 prevalent amongst women diagnosed with benign pathology, such as endometriosis or ovarian cysts.  
134 Infertility can be caused either by the underlying pathology itself, or indirectly associated with the  
135 surgical intervention required to treat.<sup>(5)</sup> The latter is attributed to the fact that ovarian surgery, despite  
136 minimally invasive techniques, results in the resection of a number of healthy ovarian follicles and  
137 tissue.<sup>(6)</sup> This is exemplified from a study demonstrating that Anti-Mullerian Hormone (AMH), a  
138 reliable marker of ovarian reserve, is reduced post-operatively following surgery for endometriosis.<sup>(7)</sup>  
139 Considering the lifetime risk of women undergoing surgery for the presence of benign ovarian

1  
2  
3 140 pathology is 5-10%,<sup>(1)</sup> it is perhaps understandable why an increasing demand for the implementation  
4  
5 141 of fertility sparing surgical techniques for women with benign pathology is also prevalent.<sup>(1)</sup> Such  
6  
7 142 demand is further exacerbated by the increasing age of motherhood observed over the last few  
8  
9 143 decades.<sup>(8)</sup> Increasing age is associated with poorer oocyte quality and yield, thereby inadvertently  
10  
11 144 increasing the risk of involuntary childlessness as a direct consequence of age related fertility  
12  
13 145 decline.<sup>(9)</sup> If women delay attempting pregnancy to a later age, in addition to the risks of surgically  
14  
15 146 induced impairment of ovarian tissue, overall chances of achieving pregnancy in the future maybe  
16  
17 147 significantly reduced. It is imperative therefore, that fertility sparing techniques are implemented,  
18  
19 148 where possible, in women of reproductive age in order to optimize the chances of future successful  
20  
21 149 conception.  
22  
23

24 150

### 26 151 **Intra-operative ultrasound**

28 152 The use of intraoperative ultrasound has been widely implemented amongst specialties.<sup>(10)</sup> However,  
29  
30 153 within gynaecological surgery, it is not as commonly recognized, despite evidence that it can be used  
31  
32 154 as an adjunct to improving minimally invasive surgical techniques.<sup>(11)</sup> This is primarily due to the  
33  
34 155 improved visualization of the operative field, which can assist more technically difficult surgical  
35  
36 156 procedures, thus minimizing intraoperative complications.<sup>(12)</sup> The application of ultrasound guidance  
37  
38 157 within gynaecological procedures have included predominantly ovarian cyst aspiration, in vitro  
39  
40 158 fertilization and removal or insertion of intra uterine devices.<sup>(10)</sup> Although pre-operative imaging  
41  
42 159 provides procedural planning, it cannot compare to the information gained from real time imaging.  
43  
44 160 For example, in previous studies, intraoperative ultrasound detected more myomas during  
45  
46 161 myomectomy than pre-operative transvaginal imaging.<sup>(13)</sup> Furthermore, it provides the potential to  
47  
48 162 assess lesion margins, ensuring resection of pathology is complete with negligible damage to  
49  
50 163 surrounding healthy tissues.<sup>(11)</sup> This is consistent with a recent systematic review, which also  
51  
52 164 demonstrated that albeit a novel technique, amongst various case series, pathology can be safely  
53  
54 165 resected without incurring injury to healthy reproductive tissue.<sup>(11)</sup> Therefore, intraoperative  
55  
56 166 ultrasound has the potential to improve surgical accuracy, reduce complications and improve patient  
57  
58 167 safety. The application of intraoperative ultrasound as an adjunct to FSS has not been widely  
59  
60



1  
2  
3 168 researched, with only a few case series reporting surgical outcomes on patients undergoing treatment  
4  
5 169 for pre-malignant or malignant pathology.<sup>(14)</sup>  
6

7 170  
8

9 171 **Aim**

11 172 To evaluate the effect on ovarian reserve following two different surgical interventions for the  
12  
13 management of benign ovarian cysts.  
14

15 174  
16

17 175 **Primary objective**

19 176 To determine the efficacy of intra-operative ultrasound as a method of fertility preservation surgery.  
20  
21

22 177  
23

24 178 **Secondary objectives**

26 179 To determine the surgical and histopathological outcomes in women who have undergone  
27  
28 intraoperative ultrasound guided ovarian cystectomy and compare to the control group.  
29

30 181  
31

32 182 **Hypothesis**

34 183 Intra-operative ultrasound guided laparoscopic ovarian cystectomy will preserve more healthy ovarian  
35  
36 tissue, resulting in a significantly reduced decline of ovarian reserve observed at 3 and 6 months post  
37  
38 operatively, as measured by AMH and antral follicle count (AFC), when compared to laparoscopic  
39  
40 ovarian cystectomy.  
41

42 187  
43

44 188 **Methods**  
45  
46

47 189  
48

49 190 **Trial Design**

51 191 This is a multi-centre randomised controlled trial with two parallel arms, comparing laparoscopic  
52  
53 ovarian cystectomy with ultrasound guided laparoscopic ovarian cystectomy (UGLOC) for the  
54  
55 management of benign ovarian cysts. Participants will be recruited from two tertiary gynaecology  
56  
57 centres in the UK. Participants will be followed up at 3 and 6 months post operatively to assess  
58  
59  
60

195 markers of ovarian reserve. Recruitment will commence October 2021, with follow up and  
196 assessment expected to conclude in October 2024. **Figure 1** summarises the trial design.

197

#### 198 **Inclusion criteria**

- 199 • Females aged between 18-50 years old
- 200 • Pregnant or non- pregnant women diagnosed with a benign ovarian cyst requiring surgical  
201 management
- 202 • Cyst classifications accepted: dermoid, endometrioma, teratoma, simple, serous cystadenoma  
203 or mucinous cystadenoma
- 204 • Informed written consent
- 205 • Bilateral ovarian cysts

206

207 A strict criterion for the US diagnostic features will include the following:

- 208 • Cyst size  $\geq 3\text{cm}$ ;  $\leq 10\text{cm}$
- 209 • International Ovarian Tumour Analysis Benign features (IOTA B) present:
  - 210 ○ Unilocular
  - 211 ○ Solid components (largest diameter  $\leq 7\text{mm}$ )
  - 212 ○ Acoustic shadows
  - 213 ○ No blood flow
  - 214 ○ Smooth multilocular cyst (largest diameter  $\leq 10\text{cm}$ )

215

#### 216 **Exclusion criteria**

- 217 • Cysts deemed to be clearly physiological and  $< 3\text{ cm}$  in maximum diameter
- 218 • Cysts  $\geq 11\text{cm}$  in maximum diameter
- 219 • Non-adnexal masses e.g. peritoneal inclusion cysts
- 220 • Cyst with features of malignancy
- 221 • The denial or withdrawal of written informed consent

222 • Women of post- menopausal or peri-menopausal status

223 • Participants unable to attend regular follow up

224

### 225 **Outcome measures**

226 The primary outcome of the study is assessment of ovarian reserve at 3 and 6 months post operatively.

227 This will be measured by markers of ovarian reserve including AMH (pmol/L) and AFC (n). The

228 secondary outcomes will include: length of hospital stay (days), presence of intra-operative cyst

229 rupture (yes or no), duration of surgery (minutes), presence of ovarian tissue within the specimen

230 (yes/no) and the grade of follicles excised with specimen (grade 0-4).

231

### 232 **Enrolment**

233 All women referred to the outpatient gynecology clinic with a suspected ovarian cyst will have a pelvic

234 transvaginal ultrasound scan (2D and 3D ultrasonography) as part of routine clinical care. If an ovarian

235 cyst is observed on ultrasound, it will be assessed according to local protocols based on simple

236 descriptors and international ovarian tumor analysis (IOTA) simple rules. Depending on the severity of

237 symptoms, nature of the cyst and whether surgical management is indicated to treat; should the woman

238 fulfil aspects of the inclusion criteria, she will be invited to participate in the study.

239

240 The study co-ordinator will be responsible for managing the registration of each participant to the trial

241 and their allocation to either treatment arm. All participants will sign a written consent form,

242 witnessed by a member of the research team, at least 24 hours after the participant information sheet

243 has been read. All consent forms will be scanned into the electronic medical notes. It will not be

244 possible to carry out any tasks pertaining to the trial, until written consent from the participant has

245 been obtained.

246

### 247 **Randomisation**

248 A separate research team within Imperial College London Healthcare Trust, Department of Cancer

249 and Surgery will be responsible for the allocation process, by producing randomisation sealed

1  
2  
3 250 envelopes in a ratio of 1:1. The team will be asked to print labels with the allocated group and fold  
4  
5 251 them so the content cannot be seen. They will then give the folded labels back to the study co-  
6  
7 252 ordinator, who will be asked to place them into sealed envelopes, which will be numbered  
8  
9 253 chronologically. The co-ordinator will not be able to see the content of the labels, in order to ensure  
10  
11 254 concealment. Given that it is necessary for the surgeon to know which operation to perform, both the  
12  
13 255 participant and research team will not be blinded. The allocated arm of the RCT will be recorded on  
14  
15 256 the Trial Subject Enrolment Log. The Principal Investigator (PI) will be responsible for keeping the  
16  
17 257 randomisation list.  
18  
19  
20 258

## 21 259 **Procedures**

22  
23  
24 260 During the recruitment process, once consent to participate in the trial has been obtained, a member of  
25  
26 261 the research team will select a sealed randomisation envelope as numbered chronologically, which will  
27  
28 262 then assign the patient to a treatment arm. The chronological order of envelopes will prevent the member  
29  
30 263 of the research team performing the randomisation themselves, or from selecting another envelope,  
31  
32 264 should they be dissatisfied with the treatment arm assigned to the participant. The participant will then  
33  
34 265 undergo a blood test to record their baseline pre-operative AMH level. The same surgeons will operate  
35  
36 266 on women, regardless of treatment arm assigned. This will aim to exclude bias, which may otherwise  
37  
38 267 attribute findings to the surgeon operating. Surgery will be performed at Imperial Healthcare NHS Trusts  
39  
40 268 and at the University College London Hospitals NHS Foundation Trust by an experienced clinician. All  
41  
42 269 participants will attend pre-operative assessment with an anaesthetist as standard practice of care. In most  
43  
44 270 cases, the surgical procedure is performed either as a day case or overnight stay.  
45  
46  
47 271

## 48 272 **Surgical Intervention**

### 49 273 *Laparoscopic ovarian cystectomy (control)*

50  
51  
52 274 Participants will undergo a laparoscopic ovarian cystectomy in the absence of ultrasound guidance.  
53  
54 275 Surgery will be performed according to basic laparoscopy principles from the British Society of  
55  
56 276 Gynaecological Endoscopy (BSGE).  
57  
58  
59  
60 277

1  
2  
3 278 *Ultrasound guided laparoscopic ovarian cystectomy (intervention)*  
4

5 279 Participants will undergo an ultrasound guided laparoscopic ovarian cystectomy. An assistant with  
6  
7 280 competencies in pelvic ultrasound will insert a transrectal probe intraoperatively, and provide real-time  
8  
9 281 ultrasound images of the ovary and cyst to be resected. The continuous use of intra-operative ultrasound  
10  
11 282 ensures the surgeon is able to differentiate between healthy ovarian tissue and cyst content. It is often  
12  
13 283 necessary following peritoneal insufflation to infiltrate 500mL of normal saline (0.9%) into the pelvis  
14  
15 284 to enhance the ultrasound image quality and transmission of the ultrasound. The surgeon will then  
16  
17 285 perform the laparoscopic ovarian cystectomy under ultrasound guidance, following basic laparoscopy  
18  
19 286 principles from the BSGE.  
20  
21

22 287  
23  
24

25 288 *Follow up*  
26

27  
28 289 Post operatively, patients will return to the outpatient gynaecology clinic for follow up at 3 and 6  
29  
30 290 months, whereby the AMH level will be checked. The blood samples will be processed by Imperial  
31  
32 291 College Healthcare Trust laboratories or University College London Hospitals NHS Foundation Trust,  
33  
34 292 depending on the site taken, and will be discarded as per local protocol once the AMH has been  
35  
36 293 determined. There are no specific storage or transfer requirements outside of normal practice. In  
37  
38 294 addition, a transvaginal ultrasound scan will be performed during the follow up appointment, to  
39  
40 295 measure AFC and assess volume of preserved ovarian tissue. Following the second follow up  
41  
42 296 attendance at 6 months, no further input is required from the participant in the study.  
43  
44  
45

46 297  
47  
48

49 298 **Discontinuation or withdrawal of participants**  
50

51 299 Participants who give consent to their recruitment to the trial agree to the intervention, compliance  
52  
53 300 with follow up assessments and data collection. Participants are free to withdraw at any time from the  
54  
55 301 protocol treatment without reason. Furthermore, participants may be withdrawn from the trial by  
56  
57 302 members of the research team, should participation in the trial no longer be deemed within the  
58  
59 303 participant's best interest. All data captured in relation to their participation may be destroyed at their  
60

1  
2  
3 304 request. Any decision to withdraw a participant from the study will be recorded in the electronic  
4  
5 305 clinical record (eCRF) files and medical notes. Reasons for stopping the trial include: non-  
6  
7 306 compliance by members of the research team to adherence of the study protocol, participants  
8  
9 307 withdrawing consent or adverse outcomes reported following intervention.  
10

11  
12 308

### 13 309 **Patient and public involvement**

14  
15 310 Various participants from gynaecology outpatient clinics voluntarily attended a virtual *research focus*  
16  
17 311 meeting, whereby their feedback regarding aspects of the study protocol were sought including:  
18  
19 312 feasibility and acceptability of the study design, methods of monitoring ovarian reserve post  
20  
21 313 operatively and acceptability of the intervention arm of the trial. They also participated in revising  
22  
23 314 patient information leaflets and GP letter templates.  
24  
25

26 315

### 27 316 **Modification of the protocol**

28  
29 317 Any amendments to the research protocol will be firstly agreed by the Principle Investigator (PI) and  
30  
31 318 the study coordinators. This may include aspects of the study design, participant recruitment, sample  
32  
33 319 size, interventions or ethics documents including participant information sheet or consent form.  
34  
35 320 Implementation of changes made will depend on subsequent approval from the Research Ethics  
36  
37 321 Committee. Any amendments made will be updated on the [clinicaltrials.gov](http://clinicaltrials.gov) website accordingly.  
38  
39

40 322

### 41 323 **Data and trial management**

42  
43 324 Electronic clinical record files (eCRFs) have been designed to assist data collection. Members of the  
44  
45 325 research team will be responsible for the completion of the eCRFs, whereby the PI will ensure  
46  
47 326 accuracy of all data reported. Members of the research team and all aspects of the study protocol will  
48  
49 327 adhere to the principles of the General Data Protection Regulation (2016/679) and the Data Protection  
50  
51 328 Act (2018). All personal data will be password protected and held on a database, accessible only from  
52  
53 329 a registered NHS Trust computer. Following data collection, all information will be anonymized  
54  
55 330 during the data analysis stage, whereby access will be restricted to the PI and study coordinator only.  
56  
57  
58  
59  
60

1  
2  
3 331 The sponsor of the study reserves the right to store all anonymized data for 10 years after the study  
4  
5 332 has finished, in relation to data subject consent forms and ten years after the study has completed in  
6  
7 333 relation to primary research data. Following this, the sponsor will adhere to the confidential  
8  
9 334 information trust destruction procedures for disposal of data. A trial management group (TMG) has  
10  
11 335 been designed including the PI, two study co-ordinators and trial staff. They are responsible for the  
12  
13 336 day to day running of the trial. The TMG will meet every 6 weeks to discuss recruitment numbers,  
14  
15 337 adverse events (AEs) encountered or potential amendments to the study protocol, if required. The  
16  
17 338 study may be subject to inspection and audit by the sponsor and other regulatory bodies to ensure  
18  
19 339 adherence to GCP and the UK Policy Framework for Health and Social Care Research for  
20  
21 340 Health and Social Care. Direct access to source data/documents as requested will be permitted. A data  
22  
23 341 safety monitoring board is not deemed necessary, as the study is associated with extremely low risks.  
24  
25  
26  
27  
28

### 29 343 **Safety**

30 344 Any questions concerning adverse event reporting will be directed to the PI in the first instance. For  
31  
32 345 non-serious AEs, whether expected or not, a brief description of associated clinical symptoms with  
33  
34 346 date and duration of onset will be documented in the medical notes. For SAEs, an SAE form will be  
35  
36 347 completed and emailed to the PI within 24 hours. Specifically, relapse and death due to other  
37  
38 348 pathology, and hospitalisations for elective treatment of a pre-existing condition do not need reporting  
39  
40 349 as SAEs. All SAEs will be reported to the Chelsea Research and Ethics Committee where in the  
41  
42 350 opinion of the PI, the event was:

- 45 351 • 'related', i.e. resulted from the administration of any of the research procedures; and,
- 47 352 • 'unexpected', i.e. an event that is not listed in the protocol as an expected occurrence.

49 353 Reports of related and unexpected SAEs will be submitted within 15 days of the PI becoming aware  
50  
51 354 of the event, using the NRES SAE form for non-IMP studies. The PI will notify the Sponsor of all  
52  
53 355 related and unexpected SAEs.  
54  
55

56 356

57 357

58 358

### 359 **Sample size and power calculation**

360 The impact of laparoscopic ovarian cystectomy performed for the management of benign ovarian  
361 cysts was investigated by Kwon et al,<sup>(15)</sup> whereby AMH and AFC was measured at 3 and 6 months  
362 post operatively. We considered this study most applicable for determining the power calculation of  
363 our randomised controlled trial, based on the following principles: pathology of the ovarian cysts  
364 were benign in nature and the sample size (n=100) is one of the largest reported in the literature  
365 review.. Kwon et al deduced that AMH levels decreased on average 30.58% (+/-29.66%) between the  
366 pre-operative value to the level assessed 3 months following surgery amongst 100  
367 women.<sup>(15)</sup> Specifically, the group of patients who underwent laparoscopic ovarian cystectomy for  
368 benign ovarian pathology had a mean (+/-SD) serum AMH of 1.59 (+/- 1.92)(ng/ml), which is  
369 equivalent to 3.57 (+/-4.31) (pmol/L).

370 At present there are no reported studies assessing the change in AMH levels following ultrasound  
371 guided ovarian cystectomy. However, within our research team, we have performed a small number  
372 of ultrasound-guided surgeries on 5 women, and therefore have a small data set, considered a *pilot*  
373 study. Amongst the 5 women, the mean difference (+/-SD) in AMH levels measured 3 months post  
374 operatively from pre-op levels was: 14.46 (+/- 21.02) pmol/L. This represents a substantial clinical  
375 difference according to previous research, and would imply women being less likely to experience  
376 fertility issues as they would be near the lower end of the normal range of AMH, rather than in the  
377 lowest decile (ca. 0-4.5).

378 In order to calculate the sample size, we used our pilot data to derive an estimate of the mean and  
379 standard deviation. We are aware from the literature that AMH is approximately log-normally  
380 distributed, as demonstrated from **Figure 2**.<sup>(16)</sup> Using this figure, we have determined the normed  
381 (percentile) transformation of values from the pilot study (**Table 1**).

382

383

384



385 Table 1: Estimated values of AMH differences based on normed percentile transformation

386

387

388

389

390

391

| Sample Size Calculation                   |                               |       |               |      |      |
|-------------------------------------------|-------------------------------|-------|---------------|------|------|
| AMH Differences (pmol/L)                  |                               |       |               |      |      |
| Treatment Group                           |                               |       | Control Group |      |      |
| Mean                                      | Mean (pilot)                  | 17.06 | 17.06         | 3.57 | 3.57 |
| Standard Deviation (SD)                   | Standard Deviation SD (pilot) | 22.28 | 22.28         | 4.31 | 4.31 |
| Coefficient of variation (CV) = (SD/Mean) | Standard Error (S.E)          | 1.31  | 6.18          | 1.08 | 1.21 |
|                                           | Lower CI                      |       | 4.70          | 1.42 |      |
|                                           | Upper CI                      |       | 29.42         | 5.73 |      |
| Number of participants                    | Minimum (n)                   | 5     | 11            | 11   | 100  |
|                                           | Small sample margin           |       | 2             | 2    |      |

392 The minimum sample size is 11

393

394 patients. Considering the small size of the pilot and the very low risks thus far, we have included 2

395 more observations to boost power, and assume an attrition of 25%. This leads to a total of 16

396 participants per arm, with a power of 0.95 to detect a difference at the 5% level using a standard t-test

397 on the log-transformed difference in means of AMH; our robust proxy for fertility. Thus, using the

398 pilot data, we anticipate 32 participants will need to be recruited to demonstrate differential AMH

399 levels (**Table 2**). It will be necessary to perform an interim analysis, given the low number of

400 participants available for the power calculation.

401 Table 2: Power Calculation

1  
2  
3 402

|                     |    |    |
|---------------------|----|----|
| Attrition (assumed) | 3  | 3  |
| Total (n)           | 16 | 16 |

4  
5  
6 403  
7  
8  
9  
10 404  
11  
12 405  
13  
14 406  
15  
16 407  
17  
18 408  
19  
20 409  
21  
22 410  
23  
24 411  
25  
26 412  
27  
28 413  
29  
30  
31 414

### **Secondary Analysis**

32  
33 415 We will exclude participants with missing data, non-compliance of follow up or adherence to the  
34  
35 416 study protocol, or those who withdraw from the study. The primary outcome will be compared across  
36  
37 417 treatment groups using univariate and multivariate analysis. Confidence intervals of 99% for  
38  
39 418 dichotomous outcomes and risk ratio will be assessed. A p value of less than 0.05 will be used to  
40  
41 419 determine statistical significance.  
42

43 420

### **Ethics and Dissemination**

44  
45 421  
46  
47 422 This study will be conducted in accordance with the principles of Good Clinical Practice. This  
48  
49 423 protocol was submitted to the Health Research Authority and Chelsea Research Ethics Committee,  
50  
51 424 whereby a favourable ethical opinion was granted. The reference number is 21/LO/036. Subsequent  
52  
53 425 approval by individual ethical committee and competent authority was granted. Any modification to  
54  
55 426 the protocol will be updated on the ClinicalTrials.gov website and disseminated to all relevant parties  
56  
57  
58  
59  
60

1  
2  
3 427 (NCT05032846). The results will be published in peer-reviewed journals and disseminated at national  
4  
5 428 and international conferences.

6  
7 429

8  
9 430 **Data sharing**

10  
11 431 For the purpose of this publication, data sharing is not applicable as no datasets have been generated  
12  
13 432 and/or analysed as yet.

14  
15 433

16  
17 434 **Discussion**

18  
19 435 Fertility sparing surgery has evolved immensely since it was first introduced for the management of  
20  
21 436 gynaecological cancers in women of reproductive age. As growing evidence suggests it is a safe and  
22  
23 437 feasible option in women of reproductive age diagnosed with Borderline Ovarian Tumours or early  
24  
25 438 stage ovarian carcinoma, few studies assess the use of fertility sparing surgery for the management of  
26  
27 439 benign pathology. However, considering the causes of infertility include a number of benign  
28  
29 440 pathologies, alongside the increasing risk of age related fertility decline associated with delayed child  
30  
31 441 bearing, the demand to implement fertility sparing techniques is imminently growing amongst women  
32  
33 442 undergoing surgery for benign pathology during their reproductive years.

34  
35 443

36  
37 444 Recent advancements within ultrasound technology have facilitated the enhancement in diagnostic  
38  
39 445 accuracy, as evidenced by the detection of smaller ovarian lesions or pathology on ultrasound scan.<sup>(14)</sup>  
40  
41 446 Furthermore, the ability to delineate cyst content from healthy ovarian tissue also reduces the risk of  
42  
43 447 cyst rupture; which depending on the content may have detrimental effects on the pelvis. Considering  
44  
45 448 evidence suggests a significantly higher volume of normal ovarian tissue is resected during  
46  
47 449 cystectomy of endometriomas when evaluated histologically,<sup>(17)</sup> the ability to preserve optimal healthy  
48  
49 450 ovarian tissue is also a benefit of intra-operative ultrasound. Therefore, combining this diagnostic tool  
50  
51 451 with FSS, provides an apt alternative to the otherwise *blind* resection of healthy ovarian tissue during  
52  
53 452 ovarian cystectomy.

54  
55 453

1  
2  
3 454 The PI and co-investigators of this study have previously published the outcomes of ultrasound guided  
4  
5 455 laparoscopic ovarian wedge resection for the management of recurrent serous borderline ovarian  
6  
7 456 tumours<sup>(14)</sup> and in the context of treatment for anti-NMDA receptor encephalitis.<sup>(18)</sup> Whilst both surgical  
8  
9 457 and oncological outcomes reported were successful, there was no measurable effect on the ovarian  
10  
11 458 reserve assessed post-operatively. This prospective trial therefore, will evaluate the efficacy of this  
12  
13 459 method of FSS and provide real-time evidence for the post-operative effects on ovarian reserve. In  
14  
15 460 addition, findings from the study will be able to deduce whether the type of ovarian cyst resected is  
16  
17 461 associated with loss of ovarian reserve, allowing clinicians to provide informative counselling, so that  
18  
19 462 women can make well informed decisions regarding their future fertility before deciding to undergo  
20  
21 463 surgery. Furthermore, the technique is readily available and considered a low cost treatment option for  
22  
23 464 the management of benign ovarian cysts. Particularly, considering transvaginal ultrasound scanning is  
24  
25 465 a competency acquired by all UK trainees, and therefore many specialists already attain the skills to  
26  
27 466 implement this method of FSS. The procedure is therefore considered to be widely applicable  
28  
29 467 nationally.  
30  
31  
32  
33

#### 34 469 **Author's contributions**

35  
36 470 JY and LSK conceived and designed the study. LSK drafted the trial protocol. JY, JV and MEB  
37  
38 471 provided methodological and statistical expertise. JY and SGM provide expertise in clinical outcomes  
39  
40 472 following ultrasound. LSK and BPJ drafted the manuscript. LSK and SS with the support of the trial  
41  
42 473 Principal Investigator, have responsibilities for day-to-day running of the trial including participant  
43  
44 474 recruitment, data collection and liaising with other sites. All authors critically reviewed and approved  
45  
46 475 the final version of the manuscript.  
47  
48  
49

#### 50 476 51 477 **Funding**

52  
53 478 This research received no specific grant from any funding agency in the public, commercial or not-  
54  
55 479 for-profit sectors  
56  
57

#### 58 480 59 481 **Disclaimer**

1  
2  
3  
4  
5  
6  
7  
8  
9  
10  
11  
12  
13  
14  
15  
16  
17  
18  
19  
20  
21  
22  
23  
24  
25  
26  
27  
28  
29  
30  
31  
32  
33  
34  
35  
36  
37  
38  
39  
40  
41  
42  
43  
44  
45  
46  
47  
48  
49  
50  
51  
52  
53  
54  
55  
56  
57  
58  
59  
60

482 The views expressed in this publication are those of the author (s)

483

484 **Competing interests**

485 None declared.

486

487 **Provenance and peer review**

488 Not commissioned; externally peer reviewed.

489

490 **Trial Personnel**

491 See **Table 3.**

492

493

494

495

496

497

498

499

500

501

502

503

504

505

506

507

508

509

For peer review only

510

**Table 3: Trial Personnel**

|                        |                                                                                                                                                                                                                                                                                                                                                                                                                                                                                                                                                                                                                                                                                                                                                                                                                                |
|------------------------|--------------------------------------------------------------------------------------------------------------------------------------------------------------------------------------------------------------------------------------------------------------------------------------------------------------------------------------------------------------------------------------------------------------------------------------------------------------------------------------------------------------------------------------------------------------------------------------------------------------------------------------------------------------------------------------------------------------------------------------------------------------------------------------------------------------------------------|
| Principle Investigator | <b>Mr Joseph Yazbek</b><br>Consultant Gynaecological Oncology Surgeon<br>Imperial College London Healthcare NHS Trust<br><a href="mailto:Joseph.yazbek@nhs.net">Joseph.yazbek@nhs.net</a>                                                                                                                                                                                                                                                                                                                                                                                                                                                                                                                                                                                                                                      |
| Sponsor Representative | <b>Becky Ward</b><br>Joint Research Office<br>Imperial College London<br><a href="mailto:Becky.ward@imperial.ac.uk">Becky.ward@imperial.ac.uk</a>                                                                                                                                                                                                                                                                                                                                                                                                                                                                                                                                                                                                                                                                              |
| Co-investigator (s)    | <b>Miss Lorraine Kasaven</b><br>Clinical Research Fellow<br>Imperial College London<br>Department of Cancer and Surgery<br><a href="mailto:l.kasaven@nhs.net">l.kasaven@nhs.net</a><br><br><b>Mr Srdjan Saso</b><br>Consultant Gynaecological Oncology Surgeon<br>Imperial College London Healthcare NHS Trust<br><a href="mailto:Srdjan.saso01@imperial.ac.uk">Srdjan.saso01@imperial.ac.uk</a><br><br><b>Mr Benjamin P Jones</b><br>Obstetrics and Gynaecology Trainee<br>Imperial College London Healthcare NHS Trust<br><a href="mailto:Benjamin.jones@nhs.net">Benjamin.jones@nhs.net</a><br><br><b>Professor Sadaf Ghaem-Maghani</b><br>Consultant Gynaecological Oncology Surgeon<br>Imperial College London Healthcare NHS Trust<br><a href="mailto:s.ghaem-maghani@imperial.ac.uk">s.ghaem-maghani@imperial.ac.uk</a> |
| Statistician           | <b>Professor Jan Verbakel</b><br>Department of Public Health and Primary Care<br>Academisch Centrum vor Huisartsgeneeskunde<br><a href="mailto:Jan.verbakel@kuleuven.be">Jan.verbakel@kuleuven.be</a>                                                                                                                                                                                                                                                                                                                                                                                                                                                                                                                                                                                                                          |
| Histopathologist       | <b>Professor Mona El-Bahrawy</b><br>Professor of Pathology<br>Department of Metabolism, Digestion and<br>Reproduction, Imperial College London<br><a href="mailto:m.elbahrawy@imperial.ac.uk">m.elbahrawy@imperial.ac.uk</a>                                                                                                                                                                                                                                                                                                                                                                                                                                                                                                                                                                                                   |

511

512

513

514

515

516

517

518

519 **References**

- 520 1. No G-tG. Management of Suspected Ovarian Masses in Premenopausal Women.
- 521 2. Dolmans MM, Manavella DD. Recent advances in fertility preservation. *Journal of Obstetrics*
- 522 *and Gynaecology Research*. 2019;45(2):266-79.
- 523 3. Park J-Y, Kim D-Y, Kim J-H, Kim Y-M, Kim Y-T, Nam J-H. Surgical management of
- 524 borderline ovarian tumors: the role of fertility-sparing surgery. *Gynecologic oncology*.
- 525 2009;113(1):75-82.
- 526 4. Oakley L, Doyle P, Maconochie N. Lifetime prevalence of infertility and infertility treatment
- 527 in the UK: results from a population-based survey of reproduction. *Human Reproduction*.
- 528 2008;23(2):447-50.
- 529 5. Rustamov O, Krishnan M, Roberts SA, Fitzgerald CT. Effect of salpingectomy, ovarian
- 530 cystectomy and unilateral salpingo-oophorectomy on ovarian reserve. *Gynecological surgery*.
- 531 2016;13(3):173-8.
- 532 6. Muzii L, Bianchi A, Crocè C, Mancini N, Panici PB. Laparoscopic excision of ovarian cysts: is
- 533 the stripping technique a tissue-sparing procedure? *Fertility and sterility*. 2002;77(3):609-14.
- 534 7. Victoria M, Labrosse J, Krief F, Cédric-Durnerin I, Comtet M, Grynberg M. Anti Müllerian
- 535 Hormone: more than a biomarker of female reproductive function. *Journal of gynecology obstetrics*
- 536 *and human reproduction*. 2019;48(1):19-24.
- 537 8. Baldwin K. Motivations for Social Egg Freezing. *Egg Freezing, Fertility and Reproductive*
- 538 *Choice (Emerald Studies in Reproduction, Culture and Society)*. 2019:69-85.
- 539 9. Jones BP, Saso S, Mania A, Smith JR, Serhal P, Ben Nagi J. The dawn of a new ice age:
- 540 social egg freezing. *Acta obstetrica et gynecologica Scandinavica*. 2018;97(6):641-7.
- 541 10. Grewal K, Jones B, L'Heveder A, Jindal S, Galazis N, Saso S, et al. The use of intra-operative
- 542 ultrasound in gynecological surgery: a review. *Future Science OA*. 2020(0):FSO678.
- 543 11. Galazis N, Saso S, Sorbi F, Jones B, Landolfo C, Al-Memar M, et al. Intraoperative
- 544 ultrasound during fertility-sparing surgery: a systematic review and practical applications.
- 545 *Gynecologic and obstetric investigation*. 2020;85(2):127-48.
- 546 12. Criniti A, Lin PC. Applications of intraoperative ultrasound in gynecological surgery. *Current*
- 547 *Opinion in Obstetrics and Gynecology*. 2005;17(4):339-42.
- 548 13. Levine DJ, Berman JM, Harris M, Chudnoff SG, Whaley FS, Palmer SL. Sensitivity of
- 549 myoma imaging using laparoscopic ultrasound compared with magnetic resonance imaging and
- 550 transvaginal ultrasound. *Journal of minimally invasive gynecology*. 2013;20(6):770-4.
- 551 14. Jones BP, Saso S, Farren J, El-Bahrawy M, Ghaem-Maghani S, Smith JR, et al. Ultrasound-
- 552 guided laparoscopic ovarian wedge resection in recurrent serous borderline ovarian tumours.
- 553 *International Journal of Gynecologic Cancer*. 2017;27(9).
- 554 15. Kwon SK, Kim SH, Yun S-C, Kim DY, Chae HD, Kim C-H, et al. Decline of serum
- 555 antimüllerian hormone levels after laparoscopic ovarian cystectomy in endometrioma and other
- 556 benign cysts: a prospective cohort study. *Fertility and sterility*. 2014;101(2):435-41.
- 557 16. Associates F. AMH- Understanding the results- Dr Mary Birdsall 2018
- 558 [20/02/2018:[Available from: [https://www.fertilityassociates.co.nz/news-and-blog/amh-](https://www.fertilityassociates.co.nz/news-and-blog/amh-understanding-the-results-dr-mary-birdsall/)
- 559 [understanding-the-results-dr-mary-birdsall/](https://www.fertilityassociates.co.nz/news-and-blog/amh-understanding-the-results-dr-mary-birdsall/).
- 560 17. Kuroda M, Kuroda K, Arakawa A, Fukumura Y, Kitade M, Kikuchi I, et al. Histological
- 561 assessment of impact of ovarian endometrioma and laparoscopic cystectomy on ovarian reserve.
- 562 *Journal of Obstetrics and Gynaecology Research*. 2012;38(9):1187-93.
- 563 18. Jones B, Rees R, Saso S, Stalder C, Smith J, Yazbek J. Ultrasound-guided laparoscopic
- 564 ovarian preserving surgery to treat anti-NMDA receptor encephalitis. *BJOG: An International Journal*
- 565 *of Obstetrics & Gynaecology*. 2017;124(2):337-41.
- 566

1  
2  
3  
4  
5  
6  
7  
8  
9  
10  
11  
12  
13  
14  
15  
16  
17  
18  
19  
20  
21  
22  
23  
24  
25  
26  
27  
28  
29  
30  
31  
32  
33  
34  
35  
36  
37  
38  
39  
40  
41  
42  
43  
44  
45  
46  
47  
48  
49  
50  
51  
52  
53  
54  
55  
56  
57  
58  
59  
60

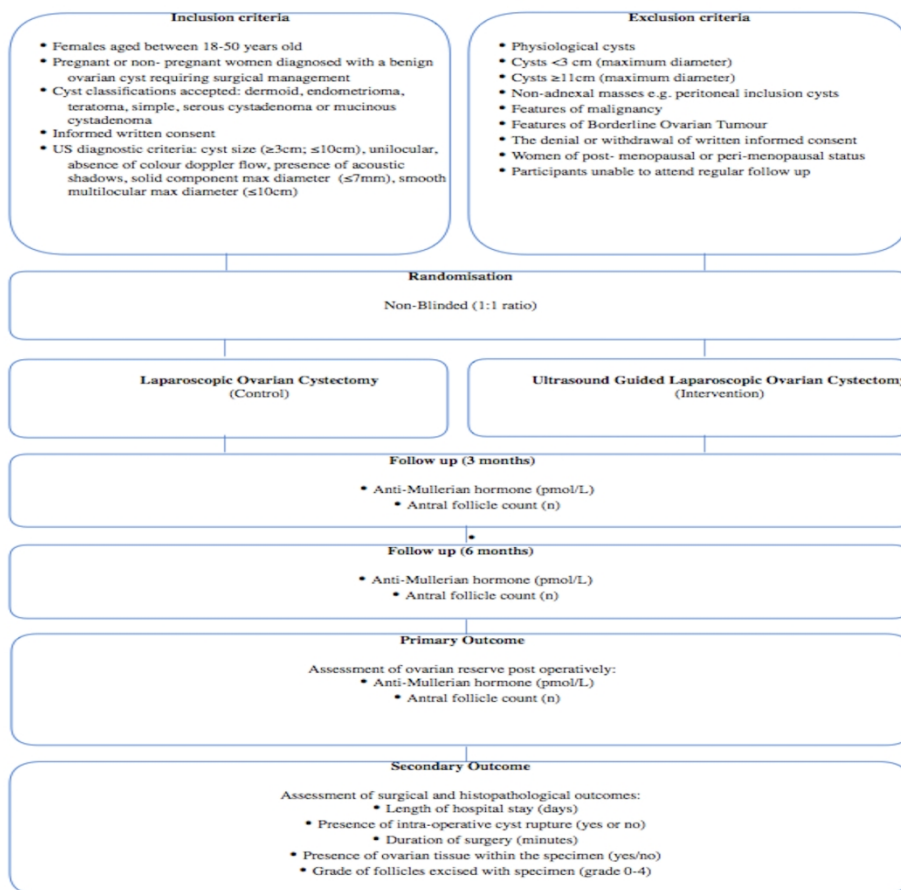

89x89mm (600 x 600 DPI)



1  
2  
3  
4  
5  
6  
7  
8  
9  
10  
11  
12  
13  
14  
15  
16  
17  
18  
19  
20  
21  
22  
23  
24  
25  
26  
27  
28  
29  
30  
31  
32  
33  
34  
35  
36  
37  
38  
39  
40  
41  
42  
43  
44  
45  
46  
47  
48  
49  
50  
51  
52  
53  
54  
55  
56  
57  
58  
59  
60

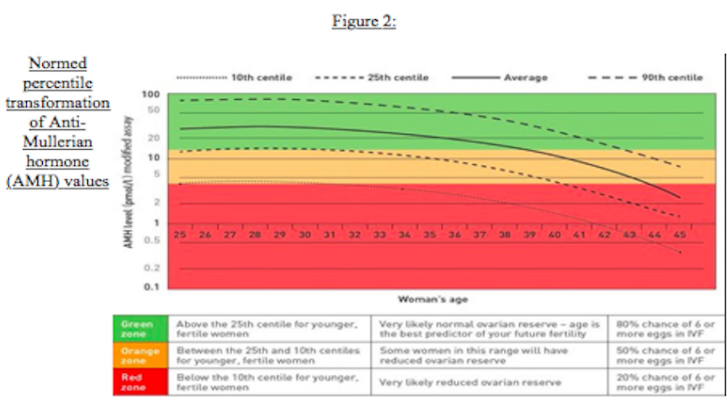

90x90mm (300 x 300 DPI)

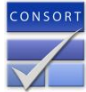

## CONSORT 2010 checklist of information to include when reporting a randomised trial\*

| Section/Topic                    | Item No | Checklist item                                                                                                                                                                              | Reported on page No |
|----------------------------------|---------|---------------------------------------------------------------------------------------------------------------------------------------------------------------------------------------------|---------------------|
| <b>Title and abstract</b>        |         |                                                                                                                                                                                             |                     |
|                                  | 1a      | Identification as a randomised trial in the title                                                                                                                                           | 1                   |
|                                  | 1b      | Structured summary of trial design, methods, results, and conclusions (for specific guidance see CONSORT for abstracts)                                                                     | 2                   |
| <b>Introduction</b>              |         |                                                                                                                                                                                             |                     |
| Background and objectives        | 2a      | Scientific background and explanation of rationale                                                                                                                                          | 5                   |
|                                  | 2b      | Specific objectives or hypotheses                                                                                                                                                           | 7                   |
| <b>Methods</b>                   |         |                                                                                                                                                                                             |                     |
| Trial design                     | 3a      | Description of trial design (such as parallel, factorial) including allocation ratio                                                                                                        | 7                   |
|                                  | 3b      | Important changes to methods after trial commencement (such as eligibility criteria), with reasons                                                                                          | NA                  |
| Participants                     | 4a      | Eligibility criteria for participants                                                                                                                                                       | 8                   |
|                                  | 4b      | Settings and locations where the data were collected                                                                                                                                        | 10                  |
| Interventions                    | 5       | The interventions for each group with sufficient details to allow replication, including how and when they were actually administered                                                       | 9                   |
| Outcomes                         | 6a      | Completely defined pre-specified primary and secondary outcome measures, including how and when they were assessed                                                                          | 9                   |
|                                  | 6b      | Any changes to trial outcomes after the trial commenced, with reasons                                                                                                                       | 12                  |
| Sample size                      | 7a      | How sample size was determined                                                                                                                                                              | 13                  |
|                                  | 7b      | When applicable, explanation of any interim analyses and stopping guidelines                                                                                                                | 14                  |
| <b>Randomisation:</b>            |         |                                                                                                                                                                                             |                     |
| Sequence generation              | 8a      | Method used to generate the random allocation sequence                                                                                                                                      | 9                   |
|                                  | 8b      | Type of randomisation; details of any restriction (such as blocking and block size)                                                                                                         | 10                  |
| Allocation concealment mechanism | 9       | Mechanism used to implement the random allocation sequence (such as sequentially numbered containers), describing any steps taken to conceal the sequence until interventions were assigned | 10                  |
| Implementation                   | 10      | Who generated the random allocation sequence, who enrolled participants, and who assigned participants to interventions                                                                     | 9                   |
| Blinding                         | 11a     | If done, who was blinded after assignment to interventions (for example, participants, care providers, those                                                                                | 10                  |

|    |                          |                                                             |                                                                                                                  |
|----|--------------------------|-------------------------------------------------------------|------------------------------------------------------------------------------------------------------------------|
| 1  |                          | assessing outcomes) and how                                 |                                                                                                                  |
| 2  | 11b                      | If relevant, description of the similarity of interventions | 10                                                                                                               |
| 3  | Statistical methods      | 12a                                                         | Statistical methods used to compare groups for primary and secondary outcomes                                    |
| 4  |                          | 12b                                                         | Methods for additional analyses, such as subgroup analyses and adjusted analyses                                 |
| 5  |                          |                                                             | 15                                                                                                               |
| 6  | <b>Results</b>           |                                                             |                                                                                                                  |
| 7  | Participant flow (a      | 13a                                                         | For each group, the numbers of participants who were randomly assigned, received intended treatment, and         |
| 8  | diagram is strongly      |                                                             | were analysed for the primary outcome                                                                            |
| 9  | recommended)             | 13b                                                         | For each group, losses and exclusions after randomisation, together with reasons                                 |
| 10 |                          |                                                             | NA                                                                                                               |
| 11 | Recruitment              | 14a                                                         | Dates defining the periods of recruitment and follow-up                                                          |
| 12 |                          | 14b                                                         | Why the trial ended or was stopped                                                                               |
| 13 |                          |                                                             | 8                                                                                                                |
| 14 | Baseline data            | 15                                                          | A table showing baseline demographic and clinical characteristics for each group                                 |
| 15 | Numbers analysed         | 16                                                          | For each group, number of participants (denominator) included in each analysis and whether the analysis was      |
| 16 |                          |                                                             | by original assigned groups                                                                                      |
| 17 | Outcomes and             | 17a                                                         | For each primary and secondary outcome, results for each group, and the estimated effect size and its            |
| 18 | estimation               |                                                             | precision (such as 95% confidence interval)                                                                      |
| 19 |                          | 17b                                                         | For binary outcomes, presentation of both absolute and relative effect sizes is recommended                      |
| 20 |                          |                                                             | NA                                                                                                               |
| 21 | Ancillary analyses       | 18                                                          | Results of any other analyses performed, including subgroup analyses and adjusted analyses, distinguishing       |
| 22 |                          |                                                             | pre-specified from exploratory                                                                                   |
| 23 |                          |                                                             | NA                                                                                                               |
| 24 | Harms                    | 19                                                          | All important harms or unintended effects in each group (for specific guidance see CONSORT for harms)            |
| 25 |                          |                                                             | NA                                                                                                               |
| 26 | <b>Discussion</b>        |                                                             |                                                                                                                  |
| 27 | Limitations              | 20                                                          | Trial limitations, addressing sources of potential bias, imprecision, and, if relevant, multiplicity of analyses |
| 28 | Generalisability         | 21                                                          | Generalisability (external validity, applicability) of the trial findings                                        |
| 29 | Interpretation           | 22                                                          | Interpretation consistent with results, balancing benefits and harms, and considering other relevant evidence    |
| 30 |                          |                                                             | NA                                                                                                               |
| 31 | <b>Other information</b> |                                                             |                                                                                                                  |
| 32 | Registration             | 23                                                          | Registration number and name of trial registry                                                                   |
| 33 |                          |                                                             | 15                                                                                                               |
| 34 | Protocol                 | 24                                                          | Where the full trial protocol can be accessed, if available                                                      |
| 35 | Funding                  | 25                                                          | Sources of funding and other support (such as supply of drugs), role of funders                                  |
| 36 |                          |                                                             | 17                                                                                                               |

37 \*We strongly recommend reading this statement in conjunction with the CONSORT 2010 Explanation and Elaboration for important clarifications on all the items. If relevant, we also  
 38 recommend reading CONSORT extensions for cluster randomised trials, non-inferiority and equivalence trials, non-pharmacological treatments, herbal interventions, and pragmatic trials.  
 39 Additional extensions are forthcoming: for those and for up to date references relevant to this checklist, see [www.consort-statement.org](http://www.consort-statement.org).  
 40  
 41  
 42

# BMJ Open

## Study Protocol for a Randomised Controlled Trial on the use of Intra-operative Ultrasound Guided Laparoscopic Ovarian Cystectomy (UGLOC) as a method of fertility preservation in the management of benign ovarian cysts

|                                 |                                                                                                                                                                                                                                                                                                                                                                                                                                                                                                                                                                                                                                                                |
|---------------------------------|----------------------------------------------------------------------------------------------------------------------------------------------------------------------------------------------------------------------------------------------------------------------------------------------------------------------------------------------------------------------------------------------------------------------------------------------------------------------------------------------------------------------------------------------------------------------------------------------------------------------------------------------------------------|
| Journal:                        | <i>BMJ Open</i>                                                                                                                                                                                                                                                                                                                                                                                                                                                                                                                                                                                                                                                |
| Manuscript ID                   | bmjopen-2021-060409.R1                                                                                                                                                                                                                                                                                                                                                                                                                                                                                                                                                                                                                                         |
| Article Type:                   | Protocol                                                                                                                                                                                                                                                                                                                                                                                                                                                                                                                                                                                                                                                       |
| Date Submitted by the Author:   | 04-Jun-2022                                                                                                                                                                                                                                                                                                                                                                                                                                                                                                                                                                                                                                                    |
| Complete List of Authors:       | Kasaven, Lorraine S; Imperial College London, Cancer and Surgery; Queen Charlotte's and Chelsea Hospital, Obstetrics and Gynaecology<br>Jones, Benjamin; Imperial College London<br>Ghaem-Maghami, Sadaf; Imperial College London; Imperial College Healthcare NHS Trust<br>Verbakel, Jan; University of Oxford, Nuffield Department of Primary Care Health Sciences; KU Leuven, Department of Public Health and Primary Care<br>El-Bahrawy, Mona; Imperial College Healthcare NHS Trust, Department of Metabolism, Digestion and Reproduction<br>Saso, Srdjan; Imperial College Healthcare NHS Trust<br>Yazbek, Joseph; Imperial College Healthcare NHS Trust |
| <b>Primary Subject Heading</b>: | Obstetrics and gynaecology                                                                                                                                                                                                                                                                                                                                                                                                                                                                                                                                                                                                                                     |
| Secondary Subject Heading:      | Obstetrics and gynaecology, Research methods, Surgery                                                                                                                                                                                                                                                                                                                                                                                                                                                                                                                                                                                                          |
| Keywords:                       | Ultrasonography < OBSTETRICS, Minimally invasive surgery < GYNAECOLOGY, Reproductive medicine < GYNAECOLOGY                                                                                                                                                                                                                                                                                                                                                                                                                                                                                                                                                    |
|                                 |                                                                                                                                                                                                                                                                                                                                                                                                                                                                                                                                                                                                                                                                |

SCHOLARONE™  
Manuscripts

**BMJ Open****Study Protocol for a Randomised Controlled Trial on the use of Intra-operative Ultrasound Guided Laparoscopic Ovarian Cystectomy (UGLOC) as a method of fertility preservation in the management of benign ovarian cysts**

Lorraine S Kasaven,<sup>1,2,3</sup> Benjamin P Jones,<sup>1,2</sup> Sadaf Ghaem-Maghami,<sup>1</sup> Professor Jan Verbakel,<sup>4</sup>

Professor Mona El-Bahrawy,<sup>5</sup> Srdjan Saso,<sup>1</sup> Joseph Yazbek<sup>1</sup>

<sup>1</sup> West London Gynaecological Cancer Centre, Hammersmith Hospital, Imperial College NHS Trust, London, W12 0HS, UK.

<sup>2</sup> Department of Surgery and Cancer, Imperial College London, Du Cane Road, London W12 0NN, UK.

<sup>3</sup> Department of Cutrale Perioperative and Ageing Group, Imperial College London, W12 0NN, UK.

<sup>4</sup> Department of Public Health and Primary Care, Academisch Centrum voor Huisartsgeneeskunde

<sup>5</sup> Department of Metabolism, Digestion and Reproduction, Imperial College London, Hammersmith Hospital, London, W12 0NN, UK.

**Corresponding Author:**

Miss Lorraine Kasaven, BSc, MBChB, MRCOG, PGCert  
Department of Surgery and Cancer, Imperial College London,  
Du Cane Road, London W12 0NN, United Kingdom.

E-mail: lk226@doctors.org.uk

**Word count: 3,597**

## 29 Abstract

30 **Introduction:** The lifetime risk of women undergoing surgery for the presence of benign ovarian  
31 pathology in the united kingdom (UK) is 5-10%. Despite minimally invasive surgical techniques,  
32 evidence suggests a number of healthy ovarian follicles and tissues are resected intraoperatively,  
33 resulting in subsequent decline of ovarian reserve. As such, there is an increasing demand for the  
34 implementation of fertility preservation surgery (FPS). This study will evaluate the effect on ovarian  
35 reserve following two different surgical interventions for the management of benign ovarian cysts.

36 **Methods and analysis:** We will conduct a two-armed randomised controlled trial comparing  
37 laparoscopic ovarian cystectomy, considered gold standard treatment as per the Royal College of  
38 Obstetricians and Gynaecologists (RCOG) Green Top guidelines for the management of benign  
39 ovarian cysts, with ultrasound guided laparoscopic ovarian cystectomy (UGLOC), a novel method of  
40 FPS. The study commencement date was October 2021 and completion date October 2024. The  
41 primary outcome will be the difference in anti-Mullerian hormone (pmol/L) (AMH) and antral follicle  
42 count (AFC) measured 3 and 6 months post operatively from the pre-operative baseline. Secondary  
43 outcomes include assessment of various surgical and histopathological outcomes including: duration  
44 of hospital stay (days), duration of surgery (mins), presence of intra-operative cyst rupture (yes/no),  
45 presence of ovarian tissue within the specimen (yes/no) and the grade of follicles excised with  
46 specimen (grade 0-4). We aim to randomise 94 patients over 3 years to achieve power of 80% at an  
47 alpha level of 0.05.

48 **Ethics and dissemination:** Findings will be published in peer reviewed journals and presented at  
49 national and international conferences and scientific meetings. The Chelsea NHS Research and Ethics  
50 Committee have awarded ethical approval of the study (21/LO/036).

51 **Trial registration number:** NCT05032846

## 53 Key words

55 Intra-operative ultrasound, benign ovarian cyst, fertility preservation surgery

1  
2  
3 57 **Strengths and limitations of this study**  
4

- 5 58 • This is the only reported prospective, randomised controlled trial to assess the use of intra-  
6  
7 59 operative ultrasound as a method of fertility preservation surgery  
8  
9 60 • The trial will provide an evaluation of two different surgical interventions for the  
10  
11 61 management of benign ovarian cysts, in order to optimise women's ovarian reserve  
12  
13  
14 62 • The intervention is non-blinded  
15  
16 63 • Follow up of women is limited to 6 months  
17  
18  
19  
20  
21  
22  
23  
24  
25  
26  
27  
28  
29  
30  
31  
32  
33  
34  
35  
36  
37  
38  
39  
40  
41  
42  
43  
44  
45  
46  
47  
48  
49  
50  
51  
52  
53  
54  
55  
56  
57  
58  
59  
60

## 84 **Background**

85 Within the field of reproductive medicine, advancements over the last few decades have facilitated the  
86 rapidly emerging area of expertise, referred to as fertility preservation. This includes various methods  
87 to preserve reproductive tissue or gametes such as medical, surgical or laboratory techniques, thus  
88 empowering women to preserve their fecundity with a view to achieving pregnancy at a later date.<sup>(1)</sup>  
89 Such techniques were initially considered for women of reproductive age diagnosed with cancer,  
90 embarking on gonadotoxic treatment regimens including chemotherapy or radiotherapy, or  
91 undergoing radical surgery to remove gynaecological organs, thus rendering them infertile. Thus, in  
92 the context of surgical management of gynaecological cancers, there has been an increasing demand  
93 for less radical procedures, with a shift towards conservative surgical methods, in order to preserve  
94 the reproductive organs. In appropriately selected women, this enables the opportunity to balance the  
95 risks of recurrence from disease, whilst reserving the ability to conceive in the future. As such, the  
96 mainstay treatment of Borderline Ovarian Tumours for example, in women with early-stage disease,  
97 non-invasive implants or for those who wish to conceive, is fertility preservation surgery (FPS). Such  
98 procedures include performing a unilateral salpingo-oophorectomy (USO) or ovarian cystectomy,  
99 compared to previously adopted surgical methods of radical debulking, which required bilateral  
100 salpingo-oophorectomy. Evidence suggests that in this context, FPS is both safe and feasible.<sup>(2)</sup>  
101  
102 Consideration of fertility however, is no longer limited to women undergoing treatment for cancer, as  
103 evidence suggests 1 in 6 women now experience infertility.<sup>(3)</sup> Although there are a number of causes,  
104 it is also prevalent amongst women diagnosed with benign pathology, such as endometriosis or  
105 ovarian cysts. Infertility can be caused either by the underlying pathology itself, or indirectly  
106 associated with the surgical intervention required to treat.<sup>(4)</sup> The latter is attributed to the fact that  
107 ovarian surgery, despite minimally invasive techniques, results in the resection of a number of healthy  
108 ovarian follicles and tissue.<sup>(5)</sup> This is exemplified from a study demonstrating that anti-Mullerian  
109 hormone (AMH), a reliable marker of ovarian reserve, is reduced post-operatively following surgery  
110 for endometriosis.<sup>(6)</sup> Considering the lifetime risk of women undergoing surgery for the presence of  
111 benign ovarian pathology is 5-10%,<sup>(7)</sup> it is perhaps understandable why there is an increasing demand



1  
2  
3 112 for fertility preserving surgical techniques for women with benign pathology.<sup>(8)</sup> Such demand is  
4  
5 113 further exacerbated by the increasing age of motherhood observed over the last few decades.<sup>(9)</sup>  
6  
7 114 Increasing age is associated with poorer oocyte quality and yield, thereby inadvertently increasing the  
8  
9 115 risk of involuntary childlessness as a direct consequence of age related fertility decline.<sup>(10)</sup> If women  
10  
11 116 delay attempting pregnancy to a later age, in addition to the risks of surgically induced impairment of  
12  
13 117 ovarian tissue, overall chances of achieving pregnancy in the future maybe significantly reduced. It is  
14  
15 118 imperative therefore, that fertility preserving techniques are implemented, where possible, in women  
16  
17 119 of reproductive age in order to optimize the chances of future successful conception.  
18  
19  
20  
21

120

### 121 **Intra-operative ultrasound**

122 The use of intraoperative ultrasound has been widely implemented, with frequent use observed in the  
123 resection of hepatic metastatic disease, neuroendocrine tumours from the pancreas and renal cell  
124 carcinoma.<sup>(11, 12)</sup> However, within gynaecological surgery, it is not as commonly recognized, despite  
125 evidence that it can be used as an adjunct to improving minimally invasive surgical techniques.<sup>(13)</sup>  
126 This is primarily due to the improved visualization of the operative field, which can assist more  
127 technically difficult surgical procedures, thus minimizing intraoperative complications and injury to  
128 surrounding vessels and organs.<sup>(14)</sup> The application of ultrasound guidance within gynaecological  
129 procedures have included predominantly ovarian cyst aspiration, in vitro fertilization and removal or  
130 insertion of intra uterine devices and in fertility preservation surgery for Borderline Ovarian  
131 Tumours.<sup>(11, 15)</sup> Although pre-operative imaging provides procedural planning, it cannot compare to  
132 the information gained from real time imaging. For example, in previous studies, intraoperative  
133 ultrasound detected more myomas during myomectomy than pre-operative transvaginal imaging.<sup>(16)</sup>  
134 Furthermore, it provides the potential to assess lesion margins, ensuring resection of pathology is  
135 complete with negligible damage to surrounding healthy tissues.<sup>(13)</sup> This is consistent with a recent  
136 systematic review, which also demonstrated that albeit a novel technique, amongst various case series,  
137 pathology can be safely resected without incurring injury to healthy reproductive tissue as  
138 differentiation between pathology and healthy ovarian tissue could clearly be defined on scan.<sup>(13)</sup> The  
139 application of intraoperative ultrasound as an adjunct to FPS has not been widely researched, with

1  
2  
3 140 only a few case series reporting surgical outcomes on patients undergoing treatment for pre-malignant  
4  
5 141 or malignant pathology.<sup>(17)</sup>  
6

7 142

9 143 **Aim**

11 144 To compare the effect of two different surgical interventions, including either laparoscopic ovarian  
12  
13 145 cystectomy (control group) or ultrasound guided laparoscopic ovarian cystectomy (UGLOC)  
14  
15 146 (experimental group) for the management of benign ovarian cysts, on the ovarian reserve measured 3  
16  
17 147 and 6 months post operatively.  
18

19 148

21 149 **Primary objective**

23 150 To compare the difference in serum AMH level and AFC number at 3 and 6 months post operatively  
24  
25 151 in women who have undergone UGLOC and compare to the control group.  
26  
27 152

28 153

30 154 **Secondary objectives**

32 155 Secondary outcomes include assessment of various surgical and histopathological outcomes  
33  
34 156 including: duration of hospital stay (days), duration of surgery (mins), presence of intra-operative cyst  
35  
36 157 rupture (yes/no), presence of ovarian tissue within the specimen (yes/no) and the grade of follicles  
37  
38 158 excised with specimen (grade 0-4).  
39  
40 159

41 160

43 161 **Hypothesis**

45 162 The difference in serum AMH level and AFC number measured at 3 and 6 months post operatively  
46  
47 163 will be significantly less following UGLOC when compared to laparoscopic ovarian cystectomy.  
48  
49 164

50 165

51 166 **Methods**

52 167

53 168 **Trial Design**

54 169 This is a single-centre randomised controlled trial with two parallel arms, comparing laparoscopic  
55  
56 170 ovarian cystectomy with UGLOC for the management of benign ovarian cysts. Women will be  
57  
58 171  
59  
60 172

1  
2  
3 168 recruited from one tertiary gynaecology centre in the UK. They will be followed up at 3 and 6 months  
4  
5 169 post operatively to assess markers of ovarian reserve. Recruitment will commence from October  
6  
7 170 2021, with follow up and assessment expected to conclude in October 2024. **Figure 1** summarises the  
8  
9 171 trial design.

10  
11  
12 17213  
14 173 **Inclusion criteria**

- 15 174 • Women aged between 18-45 years old
- 16 175 • Non- pregnant women diagnosed with a benign ovarian cyst requiring surgical management
- 17 176 • Cyst classifications accepted: mature teratoma (dermoid), simple cyst, serous cystadenoma or  
18 177 mucinous cystadenoma
- 19 178 • Informed written consent

20  
21  
22 17923  
24 180 A strict criterion for the US diagnostic features will include the following:

- 25 181 • Cyst size  $\geq 3$ cm;  $\leq 10$ cm
- 26 182 • International Ovarian Tumour Analysis Benign features (IOTA B) present:
  - 27 183 ○ Unilocular
  - 28 184 ○ Solid components (largest diameter  $\leq 7$ mm)
  - 29 185 ○ Acoustic shadows
  - 30 186 ○ No blood flow
  - 31 187 ○ Smooth multilocular cyst (largest diameter  $\leq 10$ cm)

32  
33  
34 18835  
36 189 **Exclusion criteria**

- 37 190 • Cysts deemed to be clearly physiological and  $< 3$  cm in maximum diameter
- 38 191 • Cysts  $\geq 11$ cm in maximum diameter
- 39 192 • Bilateral ovarian cysts
- 40 193 • Non-adnexal masses e.g. peritoneal inclusion cysts
- 41 194 • Cyst with features of malignancy

42  
43  
44  
45  
46  
47  
48  
49  
50  
51  
52  
53  
54  
55  
56  
57  
58  
59  
60

- 195 • Endometrioma or fimbrial cysts
- 196 • The denial or withdrawal of written informed consent
- 197 • Pregnant women
- 198 • Women of post- menopausal or peri-menopausal status
- 199 • Women unable to attend regular follow up

200

## 201 **Outcome measures**

202 The primary outcome of the study is the assessment of ovarian reserve at 3 and 6 months post  
203 operatively. This will be assessed by measuring the AMH (pmol/L) level and AFC (n). The secondary  
204 outcomes will include: length of hospital stay (days), presence of intra-operative cyst rupture (yes or  
205 no), duration of surgery (minutes), presence of ovarian tissue within the specimen (yes/no) and the  
206 grade of follicles excised with the specimen (grade 0-4).

207

## 208 **Enrolment**

209 All women referred to the outpatient gynecology clinic with a suspected ovarian cyst will have a  
210 pelvic transvaginal ultrasound scan (2D and 3D ultrasonography) as part of routine clinical care. If an  
211 ovarian cyst is diagnosed on ultrasound, it will be assessed according to local protocols based on  
212 simple descriptors and international ovarian tumor analysis (IOTA) simple rules. Depending on the  
213 severity of symptoms, nature of the cyst and whether surgical management is indicated to treat;  
214 should the woman fulfil aspects of the inclusion criteria, she will be invited to participate in the study.  
215 Any woman at the upper age limit for inclusion in the study who also presents with a history of  
216 climacteric symptoms, irregular periods or has an AFC  $\leq 4$  <sup>(18)</sup> should be considered of peri  
217 menopausal or menopausal status, and thus not eligible for recruitment to the study.

218

219 The study co-ordinator will be responsible for managing the registration of each participant to the trial  
220 and their allocation to either treatment arm. All participants will sign a written consent form,  
221 witnessed by a member of the research team, at least 24 hours after the participant information sheet

1  
2  
3 222 has been read. All consent forms will be scanned into the electronic medical notes. It will not be  
4  
5 223 possible to carry out any tasks pertaining to the trial, until written consent from the participant has  
6  
7 224 been obtained.  
8

9 225

## 11 226 **Randomisation**

13 227 A separate research team within Imperial College London Healthcare Trust, Department of Cancer  
14  
15 228 and Surgery will be responsible for the allocation process, by producing randomisation sealed  
16  
17 229 envelopes in a ratio of 1:1. The team will be asked to print labels with the allocated group and fold  
18  
19 230 them so the content cannot be seen. They will then give the folded labels back to the study co-  
20  
21 231 ordinator, who will be asked to place them into opaque sealed envelopes, which will be numbered in  
22  
23 232 ascending order. The co-ordinator will not be able to see the content of the labels, in order to ensure  
24  
25 233 concealment. Given that it is necessary for the surgeon to know which operation to perform, both the  
26  
27 234 participant and research team will not be blinded. The allocated arm of the RCT will be recorded on  
28  
29 235 the Trial Subject Enrolment Log. The Principal Investigator (PI) will be responsible for keeping the  
30  
31 236 randomisation list.  
32  
33

34 237

## 37 238 **Procedures**

39 239 During the recruitment process, once consent to participate in the trial has been obtained, a member of  
40  
41 240 the research team will select a sealed randomisation envelope as numbered in ascending order, which  
42  
43 241 will then assign the participant to a treatment arm. The ascending order of envelopes will prevent the  
44  
45 242 member of the research team performing the randomisation themselves, or from selecting another  
46  
47 243 envelope, should they be dissatisfied with the treatment arm assigned to the participant. The participant  
48  
49 244 will then undergo a blood test to record their baseline pre-operative AMH level. The same surgeons will  
50  
51 245 operate on all participants, regardless of treatment arm assigned. This will aim to exclude bias, which  
52  
53 246 may otherwise attribute findings to the surgeon operating. Surgery will be performed at Imperial  
54  
55 247 Healthcare NHS Trusts by an experienced clinician. All participants will attend pre-operative assessment  
56  
57 248 with an anaesthetist as standard practice of care. All women undergoing surgery will be required to have  
58  
59 249 an overnight stay in hospital.  
60

1  
2  
3 250  
45 251 **Surgical Intervention**6  
7 252 *Laparoscopic ovarian cystectomy (control)*

8  
9 253 Laparoscopic entry will be performed according to basic laparoscopic principles from the British Society  
10  
11 254 of Gynaecological Endoscopy (BSGE).<sup>(7)</sup> Pneumoperitoneum is achieved through infiltration of carbon  
12  
13 255 dioxide into the pelvis, which provides insufflation and visualization of the pelvic organs. Participants  
14  
15 256 will undergo laparoscopic ovarian cystectomy in the absence of ultrasound guidance. Following removal  
16  
17 257 of the cyst through laparoscopic specimen retrieval bags, routine closure is performed.

18  
19  
20 25821  
22 259 *Ultrasound guided laparoscopic ovarian cystectomy (intervention)*

23  
24 260 Laparoscopic entry and peritoneal insufflation of carbon dioxide are performed to achieve  
25  
26 261 pneumoperitoneum. Following laparoscopic entry and assessment of the operating field, 500mLs of  
27  
28 262 normal saline (0.9%) is infiltrated into the pelvis, for enhancement of the ultrasound image quality and  
29  
30 263 transmission of the ultrasound. This remains within the pelvis during the course of the operation. An  
31  
32 264 assistant with competencies in pelvic ultrasound scanning will insert a transrectal probe intraoperatively,  
33  
34 265 and provide real-time ultrasound images of the ovary and cyst to be resected. A non-traumatic instrument  
35  
36 266 is used to locate the cyst, whilst correlating between the laparoscopic and ultrasound images. The  
37  
38 267 cystectomy is performed under continuous ultrasound guidance, above the level of the saline solution,  
39  
40 268 ensuring the surgeon is able to differentiate between healthy ovarian tissue and cyst content. Following  
41  
42 269 removal of the cyst through laparoscopic specimen retrieval bags, routine closure is performed.

43  
44  
45 27046  
47 271 *Follow up*

48  
49  
50 272 Post operatively, participants will return to the outpatient gynaecology clinic for follow up at 3 and 6  
51  
52 273 months, whereby the AMH level will be assessed. The blood samples will be processed by Imperial  
53  
54 274 College Healthcare Trust laboratories and will be discarded as per local protocol once the AMH has  
55  
56 275 been determined. There are no specific storage or transfer requirements outside of normal practice. In  
57  
58 276 addition, a transvaginal ultrasound scan will be performed during the follow up appointment, to  
59  
60

1  
2  
3 277 measure AFC and assess volume of preserved ovarian tissue. Following the second follow up  
4  
5 278 attendance at 6 months, no further input is required from the participant in the study.  
6  
7

8 279  
9

## 10 11 280 **Discontinuation or withdrawal of participants**

12  
13 281 Participants who give consent to their recruitment to the trial agree to the intervention, compliance  
14  
15 282 with follow up assessments and data collection. Participants are free to withdraw at any time from the  
16  
17 283 protocol treatment without reason. Furthermore, participants may be withdrawn from the trial by  
18  
19 284 members of the research team, should participation in the trial no longer be deemed within the  
20  
21 285 participant's best interest. All data captured in relation to their participation may be destroyed at their  
22  
23 286 request. Any decision to withdraw a participant from the study will be recorded in the electronic  
24  
25 287 clinical record (eCRF) files and medical notes. Reasons for stopping the trial include: non-  
26  
27 288 compliance by members of the research team to adherence of the study protocol, participants  
28  
29 289 withdrawing consent or adverse outcomes reported following intervention.  
30  
31

32 290  
33

## 34 291 **Patient and public involvement**

35  
36 292 Ten women were approached by members of the research team from outpatient Gynaecology clinics,  
37  
38 293 to request their assistance reviewing participant information resources applicable to the study. If  
39  
40 294 agreeable, they were provided with a copy of the patient information leaflet and consent form to  
41  
42 295 review over the course of a week. They then voluntarily attended a virtual *research focus* meeting,  
43  
44 296 whereby their feedback regarding aspects of the study protocol were sought including: feasibility and  
45  
46 297 acceptability of the study design, methods of monitoring ovarian reserve post operatively and  
47  
48 298 acceptability of the intervention arm of the trial. They also participated in revising patient information  
49  
50 299 leaflets and GP letter templates.  
51

52 300  
53

## 54 301 **Modification of the protocol**

55  
56 302 Any amendments to the research protocol will be firstly agreed by the Principle Investigator (PI) and  
57  
58 303 the study coordinators. This may include aspects of the study design, participant recruitment, sample  
59  
60

1  
2  
3 304 size, interventions or ethics documents including participant information sheet or consent form.  
4

5 305 Implementation of changes made will depend on subsequent approval from the Research Ethics  
6

7 306 Committee. Any amendments made will be updated on the clinicaltrials.gov website accordingly.  
8

9 307  
10

### 11 308 **Data and trial management**

12  
13 309 Electronic clinical record files (eCRFs) have been designed to assist data collection. Members of the  
14

15 310 research team will be responsible for the completion of the eCRFs, whereby the PI will ensure  
16

17 311 accuracy of all data reported. Members of the research team and all aspects of the study protocol will  
18

19 312 adhere to the principles of the General Data Protection Regulation (2016/679) and the Data Protection  
20

21 313 Act (2018). All personal data will be password protected and held on a database, accessible only from  
22

23 314 a registered NHS Trust computer. Following data collection, all information will be anonymized  
24

25 315 during the data analysis stage, whereby access will be restricted to the PI and study coordinator only.  
26

27 316 The sponsor of the study reserves the right to store all anonymized data for 10 years after the study  
28

29 317 has finished, in relation to data subject consent forms and ten years after the study has completed in  
30

31 318 relation to primary research data. Following this, the sponsor will adhere to the confidential  
32

33 319 information trust destruction procedures for disposal of data. A trial management group (TMG) has  
34

35 320 been designed including the PI, two study co-ordinators and trial staff. They are responsible for the  
36

37 321 day to day running of the trial. The TMG will meet every 6 weeks to discuss recruitment numbers,  
38

39 322 adverse events (AEs) encountered or potential amendments to the study protocol, if required. The  
40

41 323 study may be subject to inspection and audit by the sponsor and other regulatory bodies to ensure  
42

43 324 adherence to GCP and the UK Policy Framework for Health and Social Care Research for  
44

45 325 Health and Social Care. Direct access to source data/documents as requested will be permitted. A data  
46

47 326 safety monitoring board is not deemed necessary, as the study is associated with extremely low risks.  
48

49 327  
50  
51

### 52 328 **Safety**

53  
54 329 Any questions concerning adverse event reporting will be directed to the PI in the first instance. For  
55

56 330 non-serious AEs, whether expected or not, a brief description of associated clinical symptoms with  
57

58 331 date and duration of onset will be documented in the medical notes. For SAEs, an SAE form will be  
59  
60



1  
2  
3 332 completed and emailed to the PI within 24 hours. Specifically, relapse and death due to other  
4  
5 333 pathology, and hospitalisations for elective treatment of a pre-existing condition do not need reporting  
6  
7 334 as SAEs. All SAEs will be reported to the Chelsea Research and Ethics Committee where in the  
8  
9 335 opinion of the PI, the event was:

|                                 |
|---------------------------------|
| <b>AMH Differences (pmol/L)</b> |
|---------------------------------|

- 11  
12  
13 336
- ‘related’, i.e. resulted from the administration of any of the research procedures; and,
  - ‘unexpected’, i.e. an event that is not listed in the protocol as an expected occurrence.
- 14  
15 337

16  
17 338 Reports of related and unexpected SAEs will be submitted within 15 days of the PI becoming aware  
18  
19 339 of the event, using the NRES SAE form for non-IMP studies. The PI will notify the Sponsor of all  
20  
21 340 related and unexpected SAEs.  
22

23  
24 341

25  
26 342 **Sample size and power calculation**

27  
28 343 The impact of laparoscopic ovarian cystectomy performed for the management of benign ovarian  
29  
30 344 cysts has been investigated by Kwon et al,<sup>(19)</sup> whereby AMH and AFC was measured at 3 and 6  
31  
32 345 months post operatively. We considered this study most applicable for determining the power  
33  
34 346 calculation of our randomised controlled trial, based on the following principles: pathology of the  
35  
36 347 ovarian cysts were benign in nature and the sample size (n=100) is one of the largest reported. Kwon  
37  
38 348 et al deduced that AMH levels decreased on average 30.58% (+/-29.66%) between the pre-operative  
39  
40 349 value to the level assessed 3 months following surgery.<sup>(19)</sup> Specifically, the group of women who  
41  
42 350 underwent laparoscopic ovarian cystectomy for benign ovarian pathology had a mean (+/-SD) serum  
43  
44 351 AMH of 1.59 (+/- 1.92)(ng/ml), equivalent to 3.57 (+/-4.31) (pmol/L).

45  
46  
47  
48 352 At present there are no reported studies assessing the difference in AMH levels following ultrasound  
49  
50 353 guided ovarian cystectomy. We have performed a small *pilot* study consisting of 5 women who have  
51  
52 354 undergone ultrasound-guided ovarian cystectomy for borderline ovarian tumours. In order to calculate  
53  
54 355 the sample size, we used our pilot data to derive an estimate of the mean and standard deviation.

55  
56 356 **(Table 1)**  
57  
58  
59  
60

|                                           | <b>Treatment Group</b> | <b>Control Group</b> |
|-------------------------------------------|------------------------|----------------------|
|                                           | (Pilot)                | ( Kwon et al)        |
| Mean                                      | 17.06                  | 3.57                 |
| Standard Deviation (SD)                   | 22.28                  | 4.31                 |
| Coefficient of variation (CV) = (SD/Mean) | 1.31                   | 1.21                 |
| Number of participants                    | 5                      | 100                  |

Table 1: Pilot data compared to control study

357

358

359

360

361

362

363

364

365 A power calculation was performed using the TrialSize package for a 2 sample mean for superiority  
 366 or non-inferiority trials with R Statistical Programming (version 4.2.0). We assumed a power of 80%  
 367 at an alpha level of 0.05 (two tailed), based on a superiority margin of 2.0 pmol/L in AMH,  
 368 considered to be a significant difference between the two treatment groups in the primary outcome.

369

370 Referring to Table 1, the true mean AMH difference between the groups is 13.49 pmol/L, and the  
 371 pooled standard deviation of the two groups 22.44 pmol/L. Thus, the total number of participants

1  
2  
3 372 required for each treatment arm is 47, or 94 in total. This is based on a 1:1 randomisation of  
4  
5 373 participants, which should also factor for variation in baseline characteristics. To account for a 5%  
6  
7 374 drop out and 10% loss to follow-up rate, we will recruit 108 participants into the study, or 54 per  
8  
9 375 group.

10 376

11  
12  
13 377 It will be necessary to perform an interim analysis to re-assess the standard deviation, given the low  
14  
15 378 number of participants available for the power calculation.

### 19 379 **Secondary Analysis**

20  
21 380 We will exclude participants with missing data, non-compliance of follow up or adherence to the  
22  
23 381 study protocol, or those who withdraw from the study. The primary outcome will be compared across  
24  
25 382 treatment groups using univariate and multivariate analysis. Confidence intervals of 99% for  
26  
27 383 dichotomous outcomes and risk ratio will be assessed. A p value of less than 0.05 will be used to  
28  
29 384 determine statistical significance.

30 385

### 34 386 **Ethics and Dissemination**

35  
36 387 This study will be conducted in accordance with the principles of Good Clinical Practice. This  
37  
38 388 protocol was submitted to the Health Research Authority and Chelsea Research Ethics Committee,  
39  
40 389 whereby a favourable ethical opinion was granted. The reference number is 21/LO/036. Subsequent  
41  
42 390 approval by an individual ethical committee and competent authority was granted. Any modification  
43  
44 391 to the protocol will be updated on the ClinicalTrials.gov website and disseminated to all relevant  
45  
46 392 parties (NCT05032846). The results will be published in peer-reviewed journals and disseminated at  
47  
48 393 national and international conferences.

49 394

### 52 395 **Data sharing**

53  
54 396 For the purpose of this publication, data sharing is not applicable as no datasets have been generated  
55  
56 397 and/or analysed as yet.

57 398

58  
59  
60

### 399 **Potential biases within the study**

400 Evidence suggests the type of ovarian cyst resected determines the magnitude of decline in ovarian  
401 reserve. For example, surgical resection of endometriomas, are associated with the greatest degree of  
402 decline in AMH, compared to cysts of other pathology.<sup>(20)</sup> This is most likely because the underlying  
403 pathogenesis of endometriosis itself, causes adhesions complicating the procedure and increases the  
404 volume of healthy ovarian stroma resected within the cyst contents.<sup>(19, 21)</sup> For this reason we have  
405 excluded endometriomas from the study.

406  
407 Furthermore, certain participant characteristics may lead to bias in the study, such as the ethnicity and  
408 age of the participant recruited. These are potential confounding variables, particularly as AMH levels  
409 are influenced by both age related and racial disparities.<sup>(22)</sup> Therefore it is appropriate during data  
410 analysis, to perform a separate subgroup analysis to determine whether certain demographics are  
411 associated with degree of decline of AMH between the control and experimental groups.

### 413 **Discussion**

414  
415 Fertility preservation surgery has evolved immensely since it was first introduced for the management  
416 of gynaecological cancers in women of reproductive age. As evidence continues to propagate, it is  
417 considered a safe and feasible option in women of reproductive age diagnosed with Borderline  
418 Ovarian Tumours or early stage ovarian carcinoma. Few studies however, assess the use of FPS for  
419 the management of benign ovarian pathology. Considering the causes of infertility include a number  
420 of benign pathologies, alongside the increasing risk of age related fertility decline associated with  
421 delayed child bearing, the demand for fertility preserving techniques is imminently growing amongst  
422 women undergoing surgery for benign pathology during their reproductive years.

423  
424 Recent advancements within ultrasound technology have facilitated the enhancement in diagnostic  
425 accuracy, as evidenced by the detection of smaller ovarian lesions or pathology on ultrasound scan.<sup>(17)</sup>

1  
2  
3 426 Furthermore, the ability to delineate cyst content from healthy ovarian tissue also reduces the risk of  
4  
5 427 cyst rupture; which depending on the contents may have detrimental effects on the pelvis. The ability  
6  
7 428 to preserve optimal healthy ovarian tissue is therefore a benefit of intra-operative ultrasound,  
8  
9 429 providing an apt alternative to the otherwise *blind* resection of healthy ovarian tissue during ovarian  
10  
11 430 cystectomy.

12 431  
13  
14 432 The PI and co-investigators of this study have previously published the outcomes of ultrasound guided  
15  
16 433 laparoscopic ovarian wedge resection for the management of recurrent serous borderline ovarian  
17  
18 434 tumours<sup>(17)</sup> and in the context of treatment for anti-NMDA receptor encephalitis.<sup>(23)</sup> Whilst both surgical  
19  
20 435 and oncological outcomes reported were successful, there was no measurable effect on the ovarian  
21  
22 436 reserve assessed post-operatively. This prospective trial therefore, will evaluate the effectiveness of this  
23  
24 437 method of FPS and provide real-time evidence for the post-operative effects on ovarian reserve. The  
25  
26 438 findings from the study will allow clinicians to provide informative counselling, so that women can  
27  
28 439 make well informed decisions regarding their future fertility before deciding to undergo surgery.  
29  
30 440 Furthermore, the technique is readily available and considered a low cost treatment option for the  
31  
32 441 management of benign ovarian cysts. Particularly, considering transvaginal ultrasound scanning is a  
33  
34 442 competency acquired by all UK trainees, and therefore many specialists already attain the skills to  
35  
36 443 implement this method of FPS. The procedure is therefore considered to be widely applicable  
37  
38 444 nationally.

39 445

#### 40 446 **Author's contributions**

41 447 JY and LSK conceived and designed the study. LSK drafted the trial protocol. JY, JV and MEB  
42  
43 448 provided methodological and statistical expertise. JY and SGM provide expertise in clinical outcomes  
44  
45 449 following ultrasound. LSK and BPJ drafted the manuscript. LSK and SS with the support of the trial  
46  
47 450 Principal Investigator, have responsibilities for day-to-day running of the trial including participant  
48  
49 451 recruitment, data collection and liaising with other sites. All authors critically reviewed and approved  
50  
51 452 the final version of the manuscript.

52 453

1  
2  
3 454 **Funding**

4  
5 455 This research received no specific grant from any funding agency in the public, commercial or not-  
6  
7 456 for-profit sectors

8  
9 457

10  
11 458 **Disclaimer**

12  
13 459 The views expressed in this publication are those of the author (s)

14  
15 460

16  
17 461 **Competing interests**

18  
19 462 None declared.

20  
21 463

22  
23 464 **Provenance and peer review**

24  
25 465 Not commissioned; externally peer reviewed.

26  
27 466

28  
29 467 **Figure and Table Legend**

30  
31 468 Figure 1: Summary of Trial Design

32  
33 469 Table 2: Pilot data compared to control study

34  
35 470

36  
37 471 **Trial Personnel**

38  
39 472 **Principle Investigator**

40  
41 473 Mr Joseph Yazbek  
42 474 Consultant Gynaecological Oncology Surgeon  
43 475 Imperial College London Healthcare NHS Trust  
44 476 [Joseph.yazbek@nhs.net](mailto:Joseph.yazbek@nhs.net)

45  
46 477 **Sponsor Representative**

47  
48 478 Becky Ward  
49 479 Joint Research Office  
50 480 Imperial College London  
51 481 [Becky.ward@imperial.ac.uk](mailto:Becky.ward@imperial.ac.uk)

52  
53 482

54  
55 483 **Co-investigator (s)**

56  
57 484 Miss Lorraine Kasaven  
58 485 Clinical Research Fellow  
59 486 Imperial College London

1  
2  
3 487 Department of Cancer and Surgery

4 488 [L.kasaven@nhs.net](mailto:L.kasaven@nhs.net)

5 489

6  
7 490 Mr Srdjan Saso

8 491 Consultant Gynaecological Oncology Surgeon

9 492 Imperial College London Healthcare NHS Trust

10 493 [Srdjan.saso01@imperial.ac.uk](mailto:Srdjan.saso01@imperial.ac.uk)

11 494

12  
13  
14 495 Mr Benjamin P Jones

15 496 Obstetrics and Gynaecology Trainee

16 497 Imperial College London Healthcare NHS Trust

17 498 [Benjamin.jones@nhs.net](mailto:Benjamin.jones@nhs.net)

18 499

19 500 Professor Sadaf Ghaem-Maghani

20 501 Consultant Gynaecological Oncology Surgeon

21 502 Imperial College London Healthcare NHS Trust

22 503 [s.ghaem-maghani@imperial.ac.uk](mailto:s.ghaem-maghani@imperial.ac.uk)

23

24 504 **Statistician**

25 505 Professor Jan Verbakel

26 506 Department of Public Health and Primary Care

27 507 Academisch Centrum vor Huisartsgeneeskunde

28 508 [Jan.verbakel@kuleuven.be](mailto:Jan.verbakel@kuleuven.be)

29 509

30 510 **Histopathologist**

31 511 Professor Mona El-Bahrawy

32 512 Professor of Pathology

33 513 Department of Metabolism, Digestion and Reproduction, Imperial College London

34 514 [m.elbahrawy@imperial.ac.uk](mailto:m.elbahrawy@imperial.ac.uk)

35 515

36  
37  
38 516

39  
40 517

41  
42 518

43  
44 519

45  
46 520

47  
48 521

49  
50 522

51  
52 523

53  
54 524

55  
56 525

57  
58 526

59  
60

1  
2  
3 527  
4  
5 528  
6  
7 529  
8  
9 530  
10  
11 531  
12  
13 532  
14  
15 533  
16  
17 534  
18  
19 535  
20  
21  
22 536  
23 537  
24 538  
25 539  
26 540  
27 541  
28 542  
29 543  
30 544  
31 545  
32 546  
33 547  
34 548  
35 549  
36 550  
37 551  
38 552  
39 553  
40 554  
41 555  
42 556  
43 557  
44 558  
45 559  
46 560  
47 561  
48 562  
49 563  
50 564  
51 565  
52 566  
53 567  
54 568  
55 569  
56 570  
57 571  
58 572

## References

1. Dolmans MM, Manavella DD. Recent advances in fertility preservation. *Journal of Obstetrics and Gynaecology Research*. 2019;45(2):266-79.
2. Park J-Y, Kim D-Y, Kim J-H, Kim Y-M, Kim Y-T, Nam J-H. Surgical management of borderline ovarian tumors: the role of fertility-sparing surgery. *Gynecologic oncology*. 2009;113(1):75-82.
3. Oakley L, Doyle P, Maconochie N. Lifetime prevalence of infertility and infertility treatment in the UK: results from a population-based survey of reproduction. *Human Reproduction*. 2008;23(2):447-50.
4. Rustamov O, Krishnan M, Roberts SA, Fitzgerald CT. Effect of salpingectomy, ovarian cystectomy and unilateral salpingo-oophorectomy on ovarian reserve. *Gynecological surgery*. 2016;13(3):173-8.
5. Muzii L, Bianchi A, Crocè C, Mancini N, Panici PB. Laparoscopic excision of ovarian cysts: is the stripping technique a tissue-sparing procedure? *Fertility and sterility*. 2002;77(3):609-14.
6. Victoria M, Labrosse J, Krief F, Cédric-Durnerin I, Comtet M, Grynberg M. Anti Müllerian Hormone: more than a biomarker of female reproductive function. *Journal of gynecology obstetrics and human reproduction*. 2019;48(1):19-24.
7. RCOG B. Management of Suspected Ovarian Masses in Premenopausal Women 2011; Green-top Guideline No.62
8. No G-tG. Management of Suspected Ovarian Masses in Premenopausal Women. Last accessed 28<sup>th</sup> May 2022 online.
9. Baldwin K. Motivations for Social Egg Freezing. *Egg Freezing, Fertility and Reproductive Choice (Emerald Studies in Reproduction, Culture and Society)*. 2019:69-85.
10. Jones BP, Saso S, Mania A, Smith JR, Serhal P, Ben Nagi J. The dawn of a new ice age: social egg freezing. *Acta obstetrica et gynecologica Scandinavica*. 2018;97(6):641-7.
11. Grewal K, Jones B, L'Heveder A, Jindal S, Galazis N, Saso S, et al. The use of intra-operative ultrasound in gynecological surgery: a review. *Future Science OA*. 2020(0):FSO678.
12. Lubner MG, Mankowski Gettle L, Kim DH, Ziemlewicz TJ, Dahiya N, Pickhardt P. Diagnostic and procedural intraoperative ultrasound: technique, tips and tricks for optimizing results. *The British journal of radiology*. 2021;94(1121):20201406.
13. Galazis N, Saso S, Sorbi F, Jones B, Landolfo C, Al-Memar M, et al. Intraoperative ultrasound during fertility-sparing surgery: a systematic review and practical applications. *Gynecologic and obstetric investigation*. 2020;85(2):127-48.
14. Criniti A, Lin PC. Applications of intraoperative ultrasound in gynecological surgery. *Current Opinion in Obstetrics and Gynecology*. 2005;17(4):339-42.
15. Mascilini F, Quagliozzi L, Bolomini G, Scambia G, Testa A, Fagotti A. Intraoperative ultrasound through laparoscopic probe in fertility-sparing surgery for borderline ovarian tumor recurrence. *Ultrasound in Obstetrics & Gynecology*. 2019;54(2):280-2.



- 1  
2  
3 573 16. Levine DJ, Berman JM, Harris M, Chudnoff SG, Whaley FS, Palmer SL. Sensitivity of  
4 574 myoma imaging using laparoscopic ultrasound compared with magnetic resonance imaging and  
5 575 transvaginal ultrasound. *Journal of minimally invasive gynecology*. 2013;20(6):770-4.  
6 576 17. Jones BP, Saso S, Farren J, El-Bahrawy M, Ghaem-Maghami S, Smith JR, et al. Ultrasound-  
7 577 guided laparoscopic ovarian wedge resection in recurrent serous borderline ovarian tumours.  
8 578 *International Journal of Gynecologic Cancer*. 2017;27(9).  
9 579 18. Wellons MF, Bates GW, Schreiner PJ, Siscovick DS, Sternfeld B, Lewis CE. Antral follicle  
10 580 count predicts natural menopause in a population-based sample: the CARDIA Women's Study.  
11 581 *Menopause (New York, NY)*. 2013;20(8):825.  
12 582 19. Kwon SK, Kim SH, Yun S-C, Kim DY, Chae HD, Kim C-H, et al. Decline of serum  
13 583 antimüllerian hormone levels after laparoscopic ovarian cystectomy in endometrioma and other  
14 584 benign cysts: a prospective cohort study. *Fertility and sterility*. 2014;101(2):435-41.  
15 585 20. Lind T, Hammarström M, Lampic C, Rodriguez-Wallberg K. Anti-Müllerian hormone  
16 586 reduction after ovarian cyst surgery is dependent on the histological cyst type and preoperative  
17 587 anti-Müllerian hormone levels. *Acta Obstetrica et Gynecologica Scandinavica*. 2015;94(2):183-90.  
18 588 21. Perlman S, Kjer JJ. Ovarian damage due to cyst removal: a comparison of endometriomas and  
19 589 dermoid cysts. *Acta obstetrica et gynecologica Scandinavica*. 2016;95(3):285-90.  
20 590 22. Kotlyar AM, Seifer DB. Ethnicity/race and age-specific variations of serum AMH in  
21 591 women—a review. *Frontiers in Endocrinology*. 2021:1152.  
22 592 23. Jones B, Rees R, Saso S, Stalder C, Smith J, Yazbek J. Ultrasound-guided laparoscopic  
23 593 ovarian preserving surgery to treat anti-NMDA receptor encephalitis. *BJOG: An International Journal*  
24 594 *of Obstetrics & Gynaecology*. 2017;124(2):337-41.  
25 595

1  
2  
3  
4  
5  
6  
7  
8  
9  
10  
11  
12  
13  
14  
15  
16  
17  
18  
19  
20  
21  
22  
23  
24  
25  
26  
27  
28  
29  
30  
31  
32  
33  
34  
35  
36  
37  
38  
39  
40  
41  
42  
43  
44  
45  
46  
47  
48  
49  
50  
51  
52  
53  
54  
55  
56  
57  
58  
59  
60

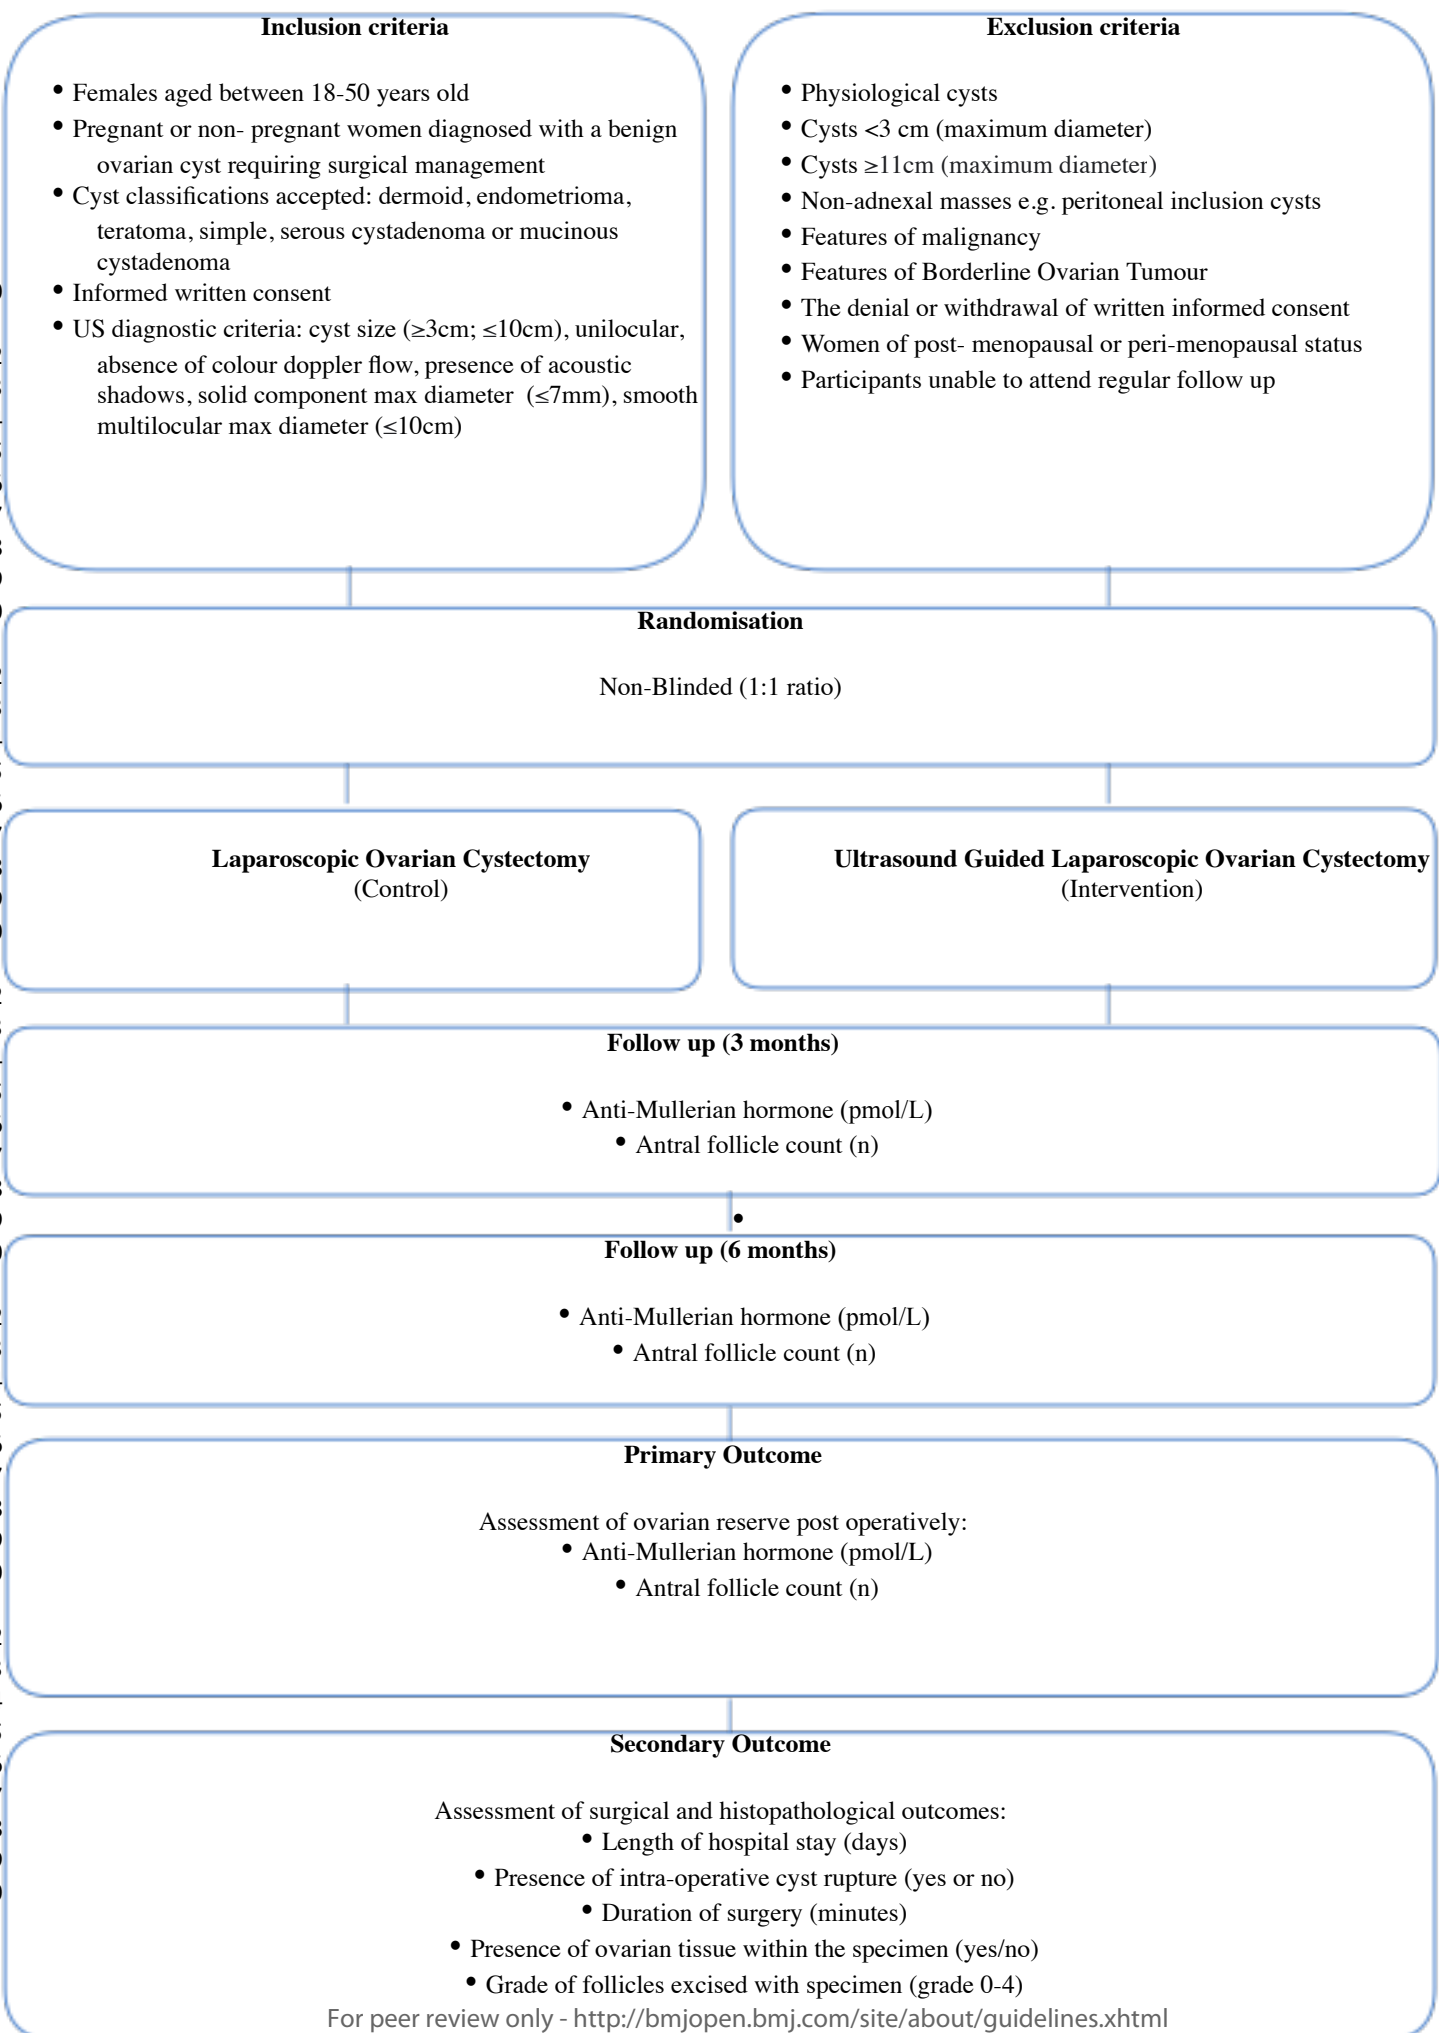

1  
2  
3  
4  
5  
6  
7  
8  
9  
10  
11  
12  
13  
14  
15  
16  
17  
18  
19  
20  
21  
22  
23  
24  
25  
26  
27  
28  
29  
30  
31  
32  
33  
34  
35  
36  
37  
38  
39  
40  
41  
42  
43  
44  
45  
46  
47  
48  
49  
50  
51  
52  
53  
54  
55  
56  
57  
58  
59  
60

For peer review only

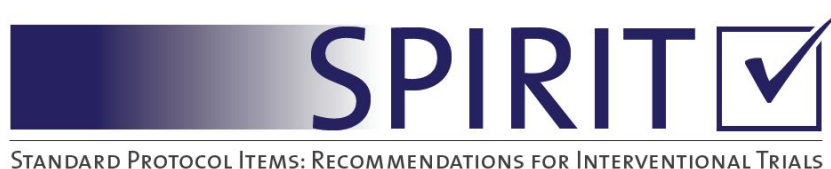

STANDARD PROTOCOL ITEMS: RECOMMENDATIONS FOR INTERVENTIONAL TRIALS

SPIRIT 2013 Checklist: Recommended items to address in a clinical trial protocol and related documents\*

| Section/item                      | Item No | Description                                                                                                                                                                                                                                                                              | Page/ (line number) |
|-----------------------------------|---------|------------------------------------------------------------------------------------------------------------------------------------------------------------------------------------------------------------------------------------------------------------------------------------------|---------------------|
| <b>Administrative information</b> |         |                                                                                                                                                                                                                                                                                          |                     |
| Title                             | 1       | Descriptive title identifying the study design, population, interventions, and, if applicable, trial acronym                                                                                                                                                                             | 1 (3-5)             |
| Trial registration                | 2a      | Trial identifier and registry name. If not yet registered, name of intended registry                                                                                                                                                                                                     | 2 (51)              |
|                                   | 2b      | All items from the World Health Organization Trial Registration Data Set                                                                                                                                                                                                                 | NA                  |
| Protocol version                  | 3       | Date and version identifier                                                                                                                                                                                                                                                              | All pages (footer)  |
| Funding                           | 4       | Sources and types of financial, material, and other support                                                                                                                                                                                                                              | 17(455-456)         |
| Roles and responsibilities        | 5a      | Names, affiliations, and roles of protocol contributors                                                                                                                                                                                                                                  | 1 (9-16)            |
|                                   | 5b      | Name and contact information for the trial sponsor                                                                                                                                                                                                                                       | 19 (472)            |
|                                   | 5c      | Role of study sponsor and funders, if any, in study design; collection, management, analysis, and interpretation of data; writing of the report; and the decision to submit the report for publication, including whether they will have ultimate authority over any of these activities | NA                  |
|                                   | 5d      | Composition, roles, and responsibilities of the coordinating centre, steering committee, endpoint adjudication committee, data management team, and other individuals or groups overseeing the trial, if applicable (see Item 21a for data monitoring committee)                         | NA                  |
| <b>Introduction</b>               |         |                                                                                                                                                                                                                                                                                          |                     |
| Background and rationale          | 6a      | Description of research question and justification for undertaking the trial, including summary of relevant studies (published and unpublished) examining benefits and harms for each intervention                                                                                       | 4(85-141)           |
|                                   | 6b      | Explanation for choice of comparators                                                                                                                                                                                                                                                    | 4(85-141)           |
| Objectives                        | 7       | Specific objectives or hypotheses                                                                                                                                                                                                                                                        | 6(143-161)          |

|    |                                                           |     |                                                                                                                                                                                                                                                                                                                                                                                |              |
|----|-----------------------------------------------------------|-----|--------------------------------------------------------------------------------------------------------------------------------------------------------------------------------------------------------------------------------------------------------------------------------------------------------------------------------------------------------------------------------|--------------|
| 1  |                                                           |     |                                                                                                                                                                                                                                                                                                                                                                                |              |
| 2  | Trial design                                              | 8   | Description of trial design including type of trial (eg, parallel group, crossover, factorial, single group), allocation ratio, and framework (eg, superiority, equivalence, noninferiority, exploratory)                                                                                                                                                                      | 6 (165-199)  |
| 3  |                                                           |     |                                                                                                                                                                                                                                                                                                                                                                                |              |
| 4  |                                                           |     |                                                                                                                                                                                                                                                                                                                                                                                |              |
| 5  |                                                           |     |                                                                                                                                                                                                                                                                                                                                                                                |              |
| 6  |                                                           |     |                                                                                                                                                                                                                                                                                                                                                                                |              |
| 7  |                                                           |     |                                                                                                                                                                                                                                                                                                                                                                                |              |
| 8  | <b>Methods: Participants, interventions, and outcomes</b> |     |                                                                                                                                                                                                                                                                                                                                                                                |              |
| 9  |                                                           |     |                                                                                                                                                                                                                                                                                                                                                                                |              |
| 10 | Study setting                                             | 9   | Description of study settings (eg, community clinic, academic hospital) and list of countries where data will be collected. Reference to where list of study sites can be obtained                                                                                                                                                                                             | 8 (208-236)  |
| 11 |                                                           |     |                                                                                                                                                                                                                                                                                                                                                                                |              |
| 12 |                                                           |     |                                                                                                                                                                                                                                                                                                                                                                                |              |
| 13 |                                                           |     |                                                                                                                                                                                                                                                                                                                                                                                |              |
| 14 | Eligibility criteria                                      | 10  | Inclusion and exclusion criteria for participants. If applicable, eligibility criteria for study centres and individuals who will perform the interventions (eg, surgeons, psychotherapists)                                                                                                                                                                                   | 7 (173-199)  |
| 15 |                                                           |     |                                                                                                                                                                                                                                                                                                                                                                                |              |
| 16 |                                                           |     |                                                                                                                                                                                                                                                                                                                                                                                |              |
| 17 |                                                           |     |                                                                                                                                                                                                                                                                                                                                                                                |              |
| 18 |                                                           |     |                                                                                                                                                                                                                                                                                                                                                                                |              |
| 19 | Interventions                                             | 11a | Interventions for each group with sufficient detail to allow replication, including how and when they will be administered                                                                                                                                                                                                                                                     | 10 (251-269) |
| 20 |                                                           |     |                                                                                                                                                                                                                                                                                                                                                                                |              |
| 21 |                                                           |     |                                                                                                                                                                                                                                                                                                                                                                                |              |
| 22 |                                                           | 11b | Criteria for discontinuing or modifying allocated interventions for a given trial participant (eg, drug dose change in response to harms, participant request, or improving/worsening disease)                                                                                                                                                                                 | 11 (301-306) |
| 23 |                                                           |     |                                                                                                                                                                                                                                                                                                                                                                                |              |
| 24 |                                                           |     |                                                                                                                                                                                                                                                                                                                                                                                |              |
| 25 |                                                           |     |                                                                                                                                                                                                                                                                                                                                                                                |              |
| 26 |                                                           | 11c | Strategies to improve adherence to intervention protocols, and any procedures for monitoring adherence (eg, drug tablet return, laboratory tests)                                                                                                                                                                                                                              | NA           |
| 27 |                                                           |     |                                                                                                                                                                                                                                                                                                                                                                                |              |
| 28 |                                                           |     |                                                                                                                                                                                                                                                                                                                                                                                |              |
| 29 |                                                           |     |                                                                                                                                                                                                                                                                                                                                                                                |              |
| 30 |                                                           |     |                                                                                                                                                                                                                                                                                                                                                                                |              |
| 31 |                                                           | 11d | Relevant concomitant care and interventions that are permitted or prohibited during the trial                                                                                                                                                                                                                                                                                  | NA           |
| 32 |                                                           |     |                                                                                                                                                                                                                                                                                                                                                                                |              |
| 33 |                                                           |     |                                                                                                                                                                                                                                                                                                                                                                                |              |
| 34 | Outcomes                                                  | 12  | Primary, secondary, and other outcomes, including the specific measurement variable (eg, systolic blood pressure), analysis metric (eg, change from baseline, final value, time to event), method of aggregation (eg, median, proportion), and time point for each outcome. Explanation of the clinical relevance of chosen efficacy and harm outcomes is strongly recommended | 6 (149-157)  |
| 35 |                                                           |     |                                                                                                                                                                                                                                                                                                                                                                                |              |
| 36 |                                                           |     |                                                                                                                                                                                                                                                                                                                                                                                |              |
| 37 |                                                           |     |                                                                                                                                                                                                                                                                                                                                                                                |              |
| 38 |                                                           |     |                                                                                                                                                                                                                                                                                                                                                                                |              |
| 39 |                                                           |     |                                                                                                                                                                                                                                                                                                                                                                                |              |
| 40 |                                                           |     |                                                                                                                                                                                                                                                                                                                                                                                |              |
| 41 |                                                           |     |                                                                                                                                                                                                                                                                                                                                                                                |              |
| 42 | Participant timeline                                      | 13  | Time schedule of enrolment, interventions (including any run-ins and washouts), assessments, and visits for participants. A schematic diagram is highly recommended (see Figure)                                                                                                                                                                                               | Figure 1     |
| 43 |                                                           |     |                                                                                                                                                                                                                                                                                                                                                                                |              |
| 44 |                                                           |     |                                                                                                                                                                                                                                                                                                                                                                                |              |
| 45 |                                                           |     |                                                                                                                                                                                                                                                                                                                                                                                |              |
| 46 |                                                           |     |                                                                                                                                                                                                                                                                                                                                                                                |              |
| 47 | Sample size                                               | 14  | Estimated number of participants needed to achieve study objectives and how it was determined, including clinical and statistical assumptions supporting any sample size calculations                                                                                                                                                                                          | 13 (342-379) |
| 48 |                                                           |     |                                                                                                                                                                                                                                                                                                                                                                                |              |
| 49 |                                                           |     |                                                                                                                                                                                                                                                                                                                                                                                |              |
| 50 |                                                           |     |                                                                                                                                                                                                                                                                                                                                                                                |              |
| 51 | Recruitment                                               | 15  | Strategies for achieving adequate participant enrolment to reach target sample size                                                                                                                                                                                                                                                                                            | 8 (208-217)  |
| 52 |                                                           |     |                                                                                                                                                                                                                                                                                                                                                                                |              |
| 53 |                                                           |     |                                                                                                                                                                                                                                                                                                                                                                                |              |

#### Methods: Assignment of interventions (for controlled trials)

|    |             |  |  |           |
|----|-------------|--|--|-----------|
| 54 |             |  |  |           |
| 55 |             |  |  |           |
| 56 | Allocation: |  |  | Page 9    |
| 57 |             |  |  | (226-249) |
| 58 |             |  |  |           |
| 59 |             |  |  |           |
| 60 |             |  |  |           |

|    |                    |     |                                                                                 |           |
|----|--------------------|-----|---------------------------------------------------------------------------------|-----------|
| 1  |                    |     |                                                                                 |           |
| 2  | Sequence           | 16a | Method of generating the allocation sequence (eg, computer-generated            | Page 9    |
| 3  | generation         |     | random numbers), and list of any factors for stratification. To reduce          | (226-249) |
| 4  |                    |     | predictability of a random sequence, details of any planned restriction (eg,    |           |
| 5  |                    |     | blocking) should be provided in a separate document that is unavailable to      |           |
| 6  |                    |     | those who enrol participants or assign interventions                            |           |
| 7  |                    |     |                                                                                 |           |
| 8  |                    |     |                                                                                 |           |
| 9  | Allocation         | 16b | Mechanism of implementing the allocation sequence (eg, central                  | Page 9    |
| 10 | concealment        |     | telephone; sequentially numbered, opaque, sealed envelopes), describing         | (226-249) |
| 11 | mechanism          |     | any steps to conceal the sequence until interventions are assigned              |           |
| 12 |                    |     |                                                                                 |           |
| 13 | Implementation     | 16c | Who will generate the allocation sequence, who will enrol participants, and     | Page 9    |
| 14 |                    |     | who will assign participants to interventions                                   | (226-249) |
| 15 |                    |     |                                                                                 |           |
| 16 | Blinding (masking) | 17a | Who will be blinded after assignment to interventions (eg, trial participants,  | Page 9    |
| 17 |                    |     | care providers, outcome assessors, data analysts), and how                      | (226-249) |
| 18 |                    |     |                                                                                 |           |
| 19 |                    | 17b | If blinded, circumstances under which unblinding is permissible, and            | Page 9    |
| 20 |                    |     | procedure for revealing a participant's allocated intervention during the trial | (226-249) |
| 21 |                    |     |                                                                                 |           |
| 22 |                    |     |                                                                                 |           |

### Methods: Data collection, management, and analysis

|    |                     |     |                                                                                 |           |
|----|---------------------|-----|---------------------------------------------------------------------------------|-----------|
| 23 |                     |     |                                                                                 |           |
| 24 |                     |     |                                                                                 |           |
| 25 | Data collection     | 18a | Plans for assessment and collection of outcome, baseline, and other trial       | Page 12   |
| 26 | methods             |     | data, including any related processes to promote data quality (eg, duplicate    | (308-326) |
| 27 |                     |     | measurements, training of assessors) and a description of study                 |           |
| 28 |                     |     | instruments (eg, questionnaires, laboratory tests) along with their reliability |           |
| 29 |                     |     | and validity, if known. Reference to where data collection forms can be         |           |
| 30 |                     |     | found, if not in the protocol                                                   |           |
| 31 |                     |     |                                                                                 |           |
| 32 |                     |     |                                                                                 |           |
| 33 |                     | 18b | Plans to promote participant retention and complete follow-up, including list   | Page 15   |
| 34 |                     |     | of any outcome data to be collected for participants who discontinue or         | (380-385) |
| 35 |                     |     | deviate from intervention protocols                                             |           |
| 36 |                     |     |                                                                                 |           |
| 37 | Data management     | 19  | Plans for data entry, coding, security, and storage, including any related      | Page 12   |
| 38 |                     |     | processes to promote data quality (eg, double data entry; range checks for      | (308-326) |
| 39 |                     |     | data values). Reference to where details of data management procedures          |           |
| 40 |                     |     | can be found, if not in the protocol                                            |           |
| 41 |                     |     |                                                                                 |           |
| 42 |                     |     |                                                                                 |           |
| 43 | Statistical methods | 20a | Statistical methods for analysing primary and secondary outcomes.               | Page 15   |
| 44 |                     |     | Reference to where other details of the statistical analysis plan can be        | (380-385) |
| 45 |                     |     | found, if not in the protocol                                                   |           |
| 46 |                     |     |                                                                                 |           |
| 47 |                     | 20b | Methods for any additional analyses (eg, subgroup and adjusted analyses)        | Page 15   |
| 48 |                     |     |                                                                                 | (380-385) |
| 49 |                     |     |                                                                                 |           |
| 50 |                     | 20c | Definition of analysis population relating to protocol non-adherence (eg, as    | Page 15   |
| 51 |                     |     | randomised analysis), and any statistical methods to handle missing data        | (380-385) |
| 52 |                     |     | (eg, multiple imputation)                                                       |           |
| 53 |                     |     |                                                                                 |           |
| 54 |                     |     |                                                                                 |           |

### Methods: Monitoring

|    |                                 |     |                                                                                                                                                                                                                                                                                                                                       |                   |
|----|---------------------------------|-----|---------------------------------------------------------------------------------------------------------------------------------------------------------------------------------------------------------------------------------------------------------------------------------------------------------------------------------------|-------------------|
| 1  |                                 |     |                                                                                                                                                                                                                                                                                                                                       |                   |
| 2  | Data monitoring                 | 21a | Composition of data monitoring committee (DMC); summary of its role and reporting structure; statement of whether it is independent from the sponsor and competing interests; and reference to where further details about its charter can be found, if not in the protocol. Alternatively, an explanation of why a DMC is not needed | Page 12 (308-326) |
| 3  |                                 |     |                                                                                                                                                                                                                                                                                                                                       |                   |
| 4  |                                 |     |                                                                                                                                                                                                                                                                                                                                       |                   |
| 5  |                                 |     |                                                                                                                                                                                                                                                                                                                                       |                   |
| 6  |                                 |     |                                                                                                                                                                                                                                                                                                                                       |                   |
| 7  |                                 |     |                                                                                                                                                                                                                                                                                                                                       |                   |
| 8  |                                 |     |                                                                                                                                                                                                                                                                                                                                       |                   |
| 9  |                                 | 21b | Description of any interim analyses and stopping guidelines, including who will have access to these interim results and make the final decision to terminate the trial                                                                                                                                                               | 13 (342-379)      |
| 10 |                                 |     |                                                                                                                                                                                                                                                                                                                                       |                   |
| 11 |                                 |     |                                                                                                                                                                                                                                                                                                                                       |                   |
| 12 |                                 |     |                                                                                                                                                                                                                                                                                                                                       |                   |
| 13 | Harms                           | 22  | Plans for collecting, assessing, reporting, and managing solicited and spontaneously reported adverse events and other unintended effects of trial interventions or trial conduct                                                                                                                                                     | 12 (328-340)      |
| 14 |                                 |     |                                                                                                                                                                                                                                                                                                                                       |                   |
| 15 |                                 |     |                                                                                                                                                                                                                                                                                                                                       |                   |
| 16 |                                 |     |                                                                                                                                                                                                                                                                                                                                       |                   |
| 17 | Auditing                        | 23  | Frequency and procedures for auditing trial conduct, if any, and whether the process will be independent from investigators and the sponsor                                                                                                                                                                                           | 12 (308-326)      |
| 18 |                                 |     |                                                                                                                                                                                                                                                                                                                                       |                   |
| 19 |                                 |     |                                                                                                                                                                                                                                                                                                                                       |                   |
| 20 |                                 |     |                                                                                                                                                                                                                                                                                                                                       |                   |
| 21 | <b>Ethics and dissemination</b> |     |                                                                                                                                                                                                                                                                                                                                       |                   |
| 22 |                                 |     |                                                                                                                                                                                                                                                                                                                                       |                   |
| 23 | Research ethics approval        | 24  | Plans for seeking research ethics committee/institutional review board (REC/IRB) approval                                                                                                                                                                                                                                             | 15 (387-394)      |
| 24 |                                 |     |                                                                                                                                                                                                                                                                                                                                       |                   |
| 25 |                                 |     |                                                                                                                                                                                                                                                                                                                                       |                   |
| 26 | Protocol amendments             | 25  | Plans for communicating important protocol modifications (eg, changes to eligibility criteria, outcomes, analyses) to relevant parties (eg, investigators, REC/IRBs, trial participants, trial registries, journals, regulators)                                                                                                      | 11 (301-306)      |
| 27 |                                 |     |                                                                                                                                                                                                                                                                                                                                       |                   |
| 28 |                                 |     |                                                                                                                                                                                                                                                                                                                                       |                   |
| 29 |                                 |     |                                                                                                                                                                                                                                                                                                                                       |                   |
| 30 | Consent or assent               | 26a | Who will obtain informed consent or assent from potential trial participants or authorised surrogates, and how (see Item 32)                                                                                                                                                                                                          | 8 (208-217)       |
| 31 |                                 |     |                                                                                                                                                                                                                                                                                                                                       |                   |
| 32 |                                 |     |                                                                                                                                                                                                                                                                                                                                       |                   |
| 33 |                                 |     |                                                                                                                                                                                                                                                                                                                                       |                   |
| 34 |                                 | 26b | Additional consent provisions for collection and use of participant data and biological specimens in ancillary studies, if applicable                                                                                                                                                                                                 | NA                |
| 35 |                                 |     |                                                                                                                                                                                                                                                                                                                                       |                   |
| 36 |                                 |     |                                                                                                                                                                                                                                                                                                                                       |                   |
| 37 | Confidentiality                 | 27  | How personal information about potential and enrolled participants will be collected, shared, and maintained in order to protect confidentiality before, during, and after the trial                                                                                                                                                  | 12 (308-326)      |
| 38 |                                 |     |                                                                                                                                                                                                                                                                                                                                       |                   |
| 39 |                                 |     |                                                                                                                                                                                                                                                                                                                                       |                   |
| 40 |                                 |     |                                                                                                                                                                                                                                                                                                                                       |                   |
| 41 |                                 |     |                                                                                                                                                                                                                                                                                                                                       |                   |
| 42 | Declaration of interests        | 28  | Financial and other competing interests for principal investigators for the overall trial and each study site                                                                                                                                                                                                                         | 17(462)           |
| 43 |                                 |     |                                                                                                                                                                                                                                                                                                                                       |                   |
| 44 |                                 |     |                                                                                                                                                                                                                                                                                                                                       |                   |
| 45 | Access to data                  | 29  | Statement of who will have access to the final trial dataset, and disclosure of contractual agreements that limit such access for investigators                                                                                                                                                                                       | 12 (308-326)      |
| 46 |                                 |     |                                                                                                                                                                                                                                                                                                                                       |                   |
| 47 |                                 |     |                                                                                                                                                                                                                                                                                                                                       |                   |
| 48 | Ancillary and post-trial care   | 30  | Provisions, if any, for ancillary and post-trial care, and for compensation to those who suffer harm from trial participation                                                                                                                                                                                                         | 12 (328-340)      |
| 49 |                                 |     |                                                                                                                                                                                                                                                                                                                                       |                   |
| 50 |                                 |     |                                                                                                                                                                                                                                                                                                                                       |                   |
| 51 | Dissemination policy            | 31a | Plans for investigators and sponsor to communicate trial results to participants, healthcare professionals, the public, and other relevant groups (eg, via publication, reporting in results databases, or other data sharing arrangements), including any publication restrictions                                                   | 15 (388-394)      |
| 52 |                                 |     |                                                                                                                                                                                                                                                                                                                                       |                   |
| 53 |                                 |     |                                                                                                                                                                                                                                                                                                                                       |                   |
| 54 |                                 |     |                                                                                                                                                                                                                                                                                                                                       |                   |
| 55 |                                 |     |                                                                                                                                                                                                                                                                                                                                       |                   |
| 56 |                                 |     |                                                                                                                                                                                                                                                                                                                                       |                   |
| 57 |                                 | 31b | Authorship eligibility guidelines and any intended use of professional writers                                                                                                                                                                                                                                                        | 17 (447-453)      |
| 58 |                                 |     |                                                                                                                                                                                                                                                                                                                                       |                   |
| 59 |                                 |     |                                                                                                                                                                                                                                                                                                                                       |                   |
| 60 |                                 |     |                                                                                                                                                                                                                                                                                                                                       |                   |

1  
2 31c Plans, if any, for granting public access to the full protocol, participant-level NA  
3 dataset, and statistical code  
4

5 **Appendices**

6  
7 Informed consent 32 Model consent form and other related documentation given to participants Appendix  
8 materials and authorised surrogates  
9

10 Biological specimens 33 Plans for collection, laboratory evaluation, and storage of biological NA  
11 specimens for genetic or molecular analysis in the current trial and for  
12 future use in ancillary studies, if applicable  
13

---

14 \*It is strongly recommended that this checklist be read in conjunction with the SPIRIT 2013  
15 Explanation & Elaboration for important clarification on the items. Amendments to the  
16 protocol should be tracked and dated. The SPIRIT checklist is copyrighted by the SPIRIT  
17 Group under the Creative Commons "[Attribution-NonCommercial-NoDerivs 3.0 Unported](#)"  
18 license.  
19  
20  
21  
22  
23  
24  
25  
26  
27  
28  
29  
30  
31  
32  
33  
34  
35  
36  
37  
38  
39  
40  
41  
42  
43  
44  
45  
46  
47  
48  
49  
50  
51  
52  
53  
54  
55  
56  
57  
58  
59  
60
